# Supplementary material for: Forecasting people exposed to tropical cyclone flooding in Southeast Africa: Lessons learned from recent events
Source: Copernicus journal article supplement (doi:10.5194/egusphere-2025-3473), 2025-10-02
Supplement: Supplementary file 1 [file egusphere-2025-3473-supplement.pdf]

## **Supplementary information - Forecasting people exposed to tropical cyclone flooding in South East Africa, lessons learnt from recent events.**

Jeffrey Neal<sup>1</sup>, Anthony Cooper<sup>2</sup>, Stephen J. Chuter, Leanne Archer<sup>1</sup>, Laura Devitt, Stephen Grey<sup>3</sup>, Laurence Hawker<sup>1</sup>, James Savage<sup>2</sup>, Elisabeth Stephens<sup>5,6</sup>, Calum Baugh<sup>4</sup>, Tim Sumner<sup>7</sup>, Katherine Marsden<sup>7</sup> and Tamara Janes<sup>7,8</sup>

1. School of Geographical Science, University of Bristol, UK [j.neal@bristol.ac.uk](mailto:j.neal@bristol.ac.uk)
2. Fathom, Bristol, UK
3. HR Wallingford Ltd, Howbery Park, Wallingford, OX10 8BA, UK
4. Forecast and Services Department, ECMWF, Shinfield Park, Reading, UK, RG2 9AX
5. Department of Meteorology, University of Reading, UK
6. Red Cross Red Crescent Climate Centre, The Hague, Netherlands
7. Foreign and Commonwealth Development Office, London, UK
8. MetOffice, Exeter, UK

### **Validation data and results**

Validation of flood extents and exposure estimates from the second landfall of tropical cyclone Freddy makes use of remotely sensed extent maps from UNOSAT and Copernicus. These are detailed below, along with population exposure estimates given WorldPop data aggregated to the district level.

The analysis begins on the 14<sup>th</sup> March 2023 with a RADARSAT image of the Sofala and Zambezi provinces in Mozambique. Exposure estimates are provided in Table S1. Flood extent maps are presented in Figures S1 to S4, showing the remotely sensed flood extents over the flood map return period (Hazard). At Quelimane, the remote sensing appears to have picked up significant amounts of surface water flooding. However, the timing of this imagery is potentially before the peak of fluvial flooding would have reached this far downstream and may underestimate maximum extents as a result. A good match is made at the inland towns of Nhamacurra and Nicoadala. Both of these towns sit within smaller fluvial catchments that will have been amongst the first to react to rainfall. Note that there appears to be a consistent offset between the satellite extents and the modelled extents in these areas. A poorer match is shown in Licuare in Nicoadala district; Licuare is on a larger river that is unlikely to have responded at the time of this imagery. Similarly, the Rio Licungo in the east of the Nhamacurra district doesn't appear to have responded fully, explaining the good match in town, and poor match elsewhere. The coastal regions around Macuse might show some coastal and pluvial flooding that, as expected, is not simulated by the fluvial flood model.

In Malawi, on the 14<sup>th</sup> March 2023 population exposure is presented in Table S2 and inundation extents in Figures S5 to S8. Flooding was observed further north than forecast in Malawi. For example, in Phalombe state (Figure S5), particularly downstream of Lake Chilwa, appears to have suffered significant flooding. It is unclear from our data alone if this is lake overflow, fluvial or pluvial flooding. GloFAS did not predict any significant event this far north, however the flood extents are most consistent with the 1 in 100 year Fathom flood hazard maps. Downstream of Phalombe in Milanje/Mulanje and Zomba (Figure S6) a fluvial event is observed along the Ruo River, a tributary of the Shire River). High exposure is picked up by the satellite extents (suggesting >1000yr event), however the satellite extents are much smaller than forecasted extents, and do not align well with the channel. Inspection of high-resolution satellite imagery (not presented) indicated the presence of tall

vegetation on the floodplain that potentially obscures much of the flooding in unpopulated areas. In Chikwawa and Nsanje (Figures S7&8) the edges of the modelled Shire River floodplain appear to match well with the edges of the satellite extents, although large swathes of what is shown as early activation flood plain in the model are not picked up in the satellite extents due to vegetation cover. Estimated populations from the satellite extents are correspondingly lower, although if the missing flooding from the remote sensing is filled, estimates from the model are likely good. Generally, we might expect floodplains of larger rivers to be easier to simulate in the inundation model.

Returning to Sofala and Zambezi districts in Mozambique, exposure to a later image from COSMO-SkyMed on 14<sup>th</sup> March 2023 is summarised in Table S3. This image appears to capture more fluvial flooding on larger rivers compared to the earlier UNOSAT (Figure S1-4; Table S1), with much less evidence of remnants of pluvial flooding. Limited flooding is seen in Quelimane (Figure S9), with a smaller extent than the earlier UNOSAT, likely due to the reduction of surface water flooding. A good match is still made in Nicoadala, Namacurra and an improved match is made in Licuare and on the Rio Licungo (Figures S10 and S11). It can be seen on the overview maps where the peak still appears not to have reached the farthest downstream locations, although tidal interactions cannot be ruled out here. Figure S12 indicates that Mahanjga da Costa and the east bank of the Rio Licungo have also now begun to react to the fluvial flooding, and a good match is seen with the forecast flood extents, with some missing downstream areas. Finally, due to being on the edge of the storm, an overestimate is observed towards the east.

Analysis of the COSMO-SkyMed flood extents on the 14<sup>th</sup> March 2023 shows an improvement on the earlier UNOSAT product for the Lower Chire river, with much better filling of low-lying floodplain areas (Figure S13). A good match between forecast and observed exposure (Table S4) is shown on Lower Chire, with satellite extents possibly extending beyond the largest modelled extents on the main river in some locations (Figure S13). There are interesting results in Caia and Mopeia (Figures S14 and S15), which give a better understanding of the interactions with the Zambezi river, a large river not in flood, and its tributaries that are in flood. The forecast model was particularly poor at capturing these river-river compounding effects due to the reliance on an offline return-period inundation mapping method, which assumes equal return periods at confluences. Specifically, GloFAS forecasts a substantial difference in return-period between the Zambezi and its tributaries, but the inundation model cannot capture the compound interaction (this issue is discussed in the main text). Flooding is seen around Mopeia (Figure S15), which indicates this tributary is reacting independently of the Zambezi. Updated data from this area is available on the 15<sup>th</sup> March from RADARSAT with exposure results summarised in Table S5. However, inundation maps are not provided as flood extents show little change.

A further UNOSAT extent map on the 17<sup>th</sup> March 2023 from Sentinel-1 covers the lower Shire river and confluence with the Zambezi. The focus of this UNOSAT output in Table S6 has moved further downstream on the Shire River from that in Table S2, with very good matches at Morrumbula and Nsanje, with the floodplain now filled. Delineation between Zambezi and tributary catchments in Mutarara is still poor in the forecast data, although it remains unclear if the full extent of flooding had reached downstream of Shire at the time of capture. Flooding is observed to have receded in southern Malawi above the Ruo/Shire Confluence (Figure S16). A very close match is seen along the Shire floodplain from Makhanga to Nsanje (Figure S17 and S18), with limited flooding observed along Shire tributaries, with any flooding on these is assumed to have passed. Very close exposure matches are found in Morrumbula district, although Nsanje appears very sensitive to small changes in

flood extents (Table S6). Extents in Mutarra (Figure S19) show the Shire floodplain, which is important to delineate from the Zambezi floodplain because this region has a relatively high population on the floodplain. The location of the flood edge between the Shire and Zambezi Rivers appears critical and has resulted in an overestimation in the forecast data because the compounding effect isn't considered. This is the first UNOSAT product that shows flooding on the Caia (southern) side of the Zambezi (Figure S20). This flood extent shows a close match to a smaller event in the Fathom hazard data (5-10yr), giving a large overestimation of exposure here from the forecast model. Peak flow is likely to have been reached in this location, so it appears that the forecast BE and RWC were an overestimate, with the storm track passing further north.

The UNOSAT update on the 17<sup>th</sup> March 2023 for the Sofala and Zambezia districts (Table S7) from the previous UNOSAT release (Table S1) appears to show more fluvial flooding, with fewer patch areas associated with pluvial flooding. Exposure matches in Nicoadala and Namacurra (Figures S21 and S22) remain good, although the observed extent is already beginning to shrink compared to previous estimates. However, in Quelimane (Figure S23), estimates of flooding and exposure are significantly less than forecast. Whilst it is possible that full extents have not developed here (peak flows were estimated to be around the time of the underlying imagery by GloFAS), the smaller extents on the river from Mopeia to Quelimane (Figure S24) suggest flooding flows on this river were not as extreme as predicted with a 5-10 year return period providing better exposure estimates compared to the remote sensing. Lack of consideration of coastal water levels may be an issue here and the complex interaction at the upstream of this watercourse with the Zambezi is not captured by GLOFAS or the Fathom inundation model. Results from COSMO SkyMed via Copernicus on the 17<sup>th</sup> March 2023 in the Quelimane area (Table S8) show that very similar conclusions can be made to the most recent UNOSAT of this area (Table S7), with receding flooding now clearly visible at upstream areas such as Nicoadala and Namacurra (Figure S25), and still a lack of extents at Quelimane (Figure S26), with smaller extents east of Mopeia (Figure S27).

The final scene analysed was obtained by RADARSAT on the 23<sup>rd</sup> March 2023. Primarily, this update shows recession, except on the lower Shire River, where flooding continues to grow, closer to the Zambezi confluence (Figure S28). Clear growth in floodplain extents can be seen on the lower Shire River since the last update on 17/03/2023 (Figure S19), with greater extents in this complex confluence area. This has a very significant impact on the exposed population of Mutarara district (Table S9), which primarily lies in this confluence region.

# UNOSAT 3528 Sofala and Zambezia districts. Situation at 14/03/2023 at 03:10 UTC

Release Date: 2023-03-13

Post-event image: RADARSAT Constellation Mission Imagery © Government of Canada (2023) - RADARSAT is an official mark of the Canadian Space Agency (acquired on 13/03/2023 at 03:01 UTC).

Scope: Quelimane area - Region between the Zambezi River Mouth and Pebane Town

**Table S1: Exposure by district for Mozambique as observed on 14/03/2023 by RADARSAT. From left to right columns indicate: administrative district; country; total population of district; the best estimate (BE) of return period in the district given the median return period forecast by GloFAS rounded to the nearest available fathom flood map return period; the reasonable worst case (RWC) given the highest return period forecast (capped at 1 in 100 year); population exposure to the remotely sensed data; and population exposure to fathom return period, where closest to the remote sensing is highlighted in bold and GloFAS best estimates and reasonable worst cases are highlighted in blue and red, respectively.**

| District                  | Country | Population | Final Estimate as of 2023-03-13 |         | Exposure from Satellite Extents | Fathom Global Flood Model Fluvial Exposure Estimates by Return Period |            |             |             |             |              |        |             |
|---------------------------|---------|------------|---------------------------------|---------|---------------------------------|-----------------------------------------------------------------------|------------|-------------|-------------|-------------|--------------|--------|-------------|
|                           |         |            | BE                              | RWC     |                                 | 1in5                                                                  | 1in10      | 1in20       | 1in50       | 1in100      | 1in200       | 1in500 | 1in1000     |
| Nicoadala                 | MOZ     | 181541     | 1in500                          | 1in1000 | 8469                            | 1317                                                                  | 2458       | 3655        | 5490        | <b>8060</b> | <b>11529</b> | 16253  | 19593       |
| Inhassunge                | MOZ     | 96032      | 1in500                          | 1in1000 | 4922                            | 27                                                                    | 103        | 147         | 226         | 458         | 776          | 918    | <b>1816</b> |
| Cidade De Quelimane       | MOZ     | 267158     | 1in500                          | 1in1000 | 4243                            | <b>9172</b>                                                           | 14544      | 17160       | 19555       | 23255       | 27151        | 33439  | 36871       |
| Maquival                  | MOZ     | 111862     | 1in500                          | 1in1000 | 3952                            | 65                                                                    | 143        | 229         | 313         | 381         | 489          | 614    | <b>770</b>  |
| Namacurra - Namacurra     | MOZ     | 167612     | 1in500                          | 1in1000 | 3552                            | 790                                                                   | 1472       | 2055        | 2957        | <b>3587</b> | <b>3933</b>  | 4447   | 4994        |
| Maganja Da Costa          | MOZ     | 211994     | 1in200                          | 1in500  | 2631                            | 342                                                                   | 1025       | <b>1876</b> | <b>3388</b> | 4248        | 5185         | 6980   | 8103        |
| Chinde                    | MOZ     | 83070      |                                 |         | 1950                            | <b>6123</b>                                                           | 10651      | 12850       | 15665       | 17128       | 18745        | 20422  | 23324       |
| Mopecia - Not Zambezi     | MOZ     | 89117      | 1in500                          | 1in1000 | 1522                            | <b>2305</b>                                                           | 5763       | 9366        | 14332       | 18416       | 22304        | 26890  | 31573       |
| Namacurra - Rio Lucungo   | MOZ     | 60920      | 1in200                          | 1in500  | 813                             | <b>431</b>                                                            | <b>873</b> | 1393        | 1866        | 2589        | 3375         | 4484   | 5167        |
| Mopecia - Zambezi Region  | MOZ     | 377        |                                 |         | 280                             | 76                                                                    | <b>175</b> | <b>287</b>  | 334         | 341         | 358          | 366    | 370         |
| Luabo                     | MOZ     | 31226      |                                 |         | 236                             | <b>6246</b>                                                           | 10701      | 15461       | 19717       | 21921       | 23586        | 25218  | 26412       |
| Marromeu - Zambezi Region | MOZ     | 109122     |                                 |         | 85                              | <b>27764</b>                                                          | 47136      | 62084       | 76490       | 82967       | 88006        | 93237  | 96595       |
| Muanza - Coastal Region   | MOZ     | 873        | 1in20                           | 1in50   | 35                              | 0                                                                     | 0          | 0           | 0           | <b>0</b>    | <b>56</b>    | 116    | 184         |
| Cheringoma - Coastal Re   | MOZ     | 2813       | 1in20                           | 1in50   | 17                              | 6                                                                     | 6          | 6           | <b>10</b>   | <b>34</b>   | 105          | 169    | 255         |
| Mocubela                  | MOZ     | 90933      | 1in200                          | 1in500  | 3                               | <b>117</b>                                                            | 223        | 459         | 676         | 974         | 1079         | 1171   | 1238        |



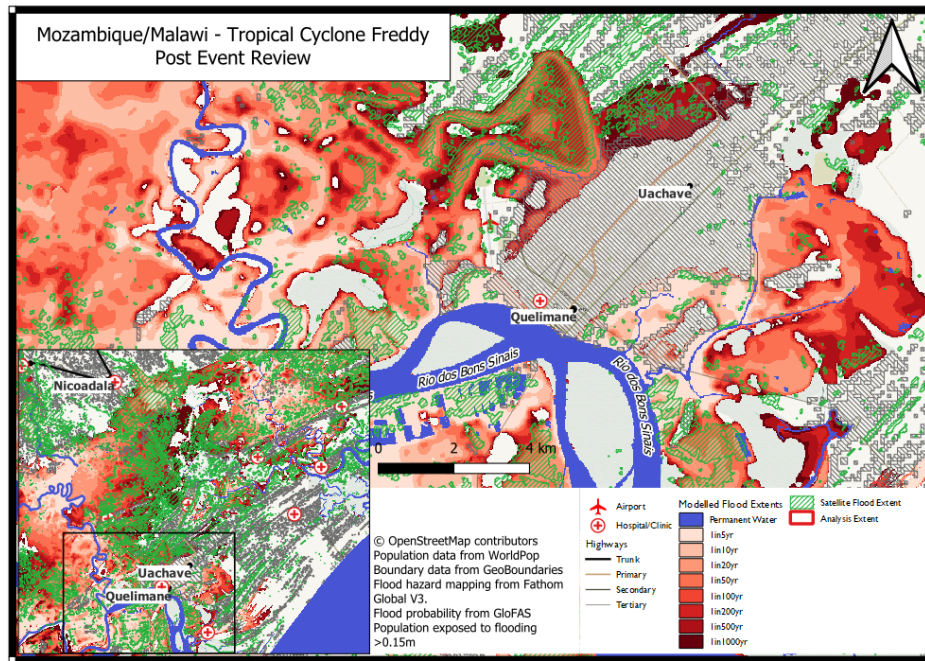

Figure S1: Return period flood extents (red), satellite derived inundation extent (Green) and major infrastructure around Quelimane.

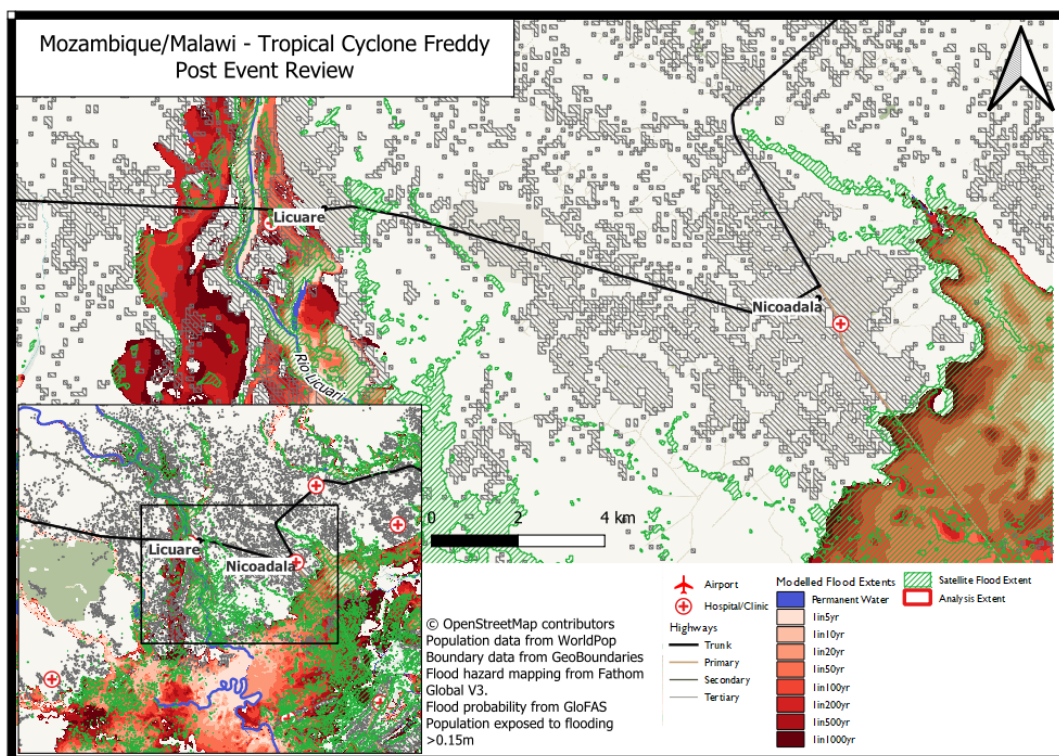

Figure S2: Return period flood extents (red), satellite derived inundation extent (Green) and major infrastructure around Licuare and Nicoadala.



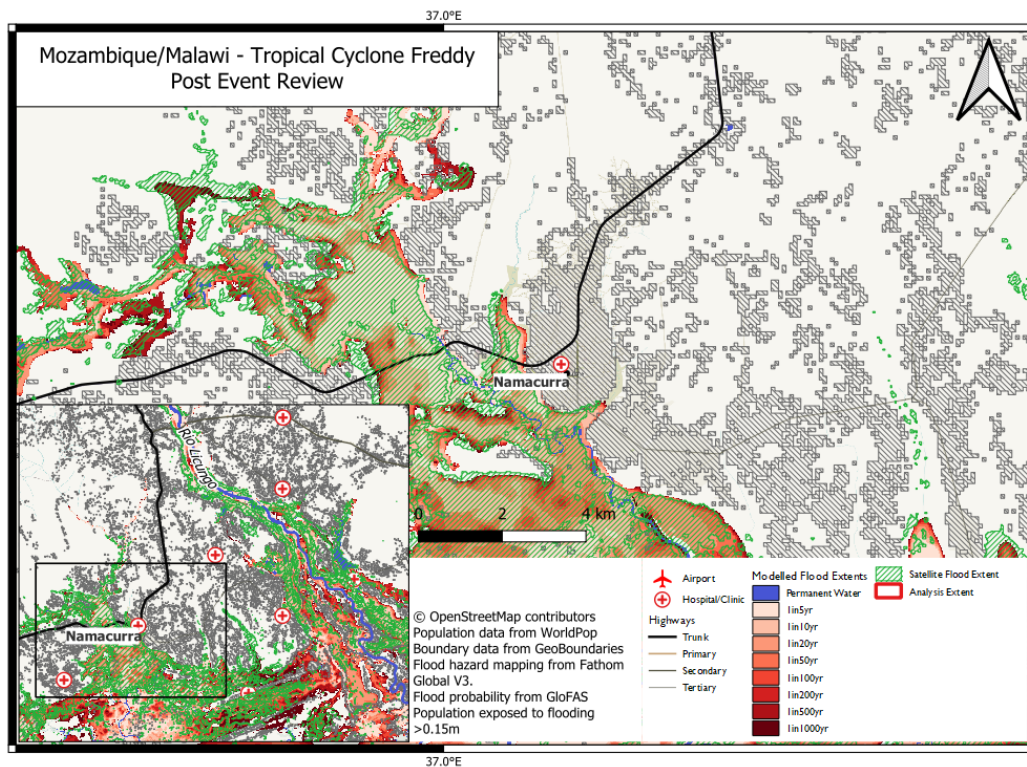

Figure S3: Return period flood extents (red), satellite derived inundation extent (Green) and major infrastructure around Namacurra.

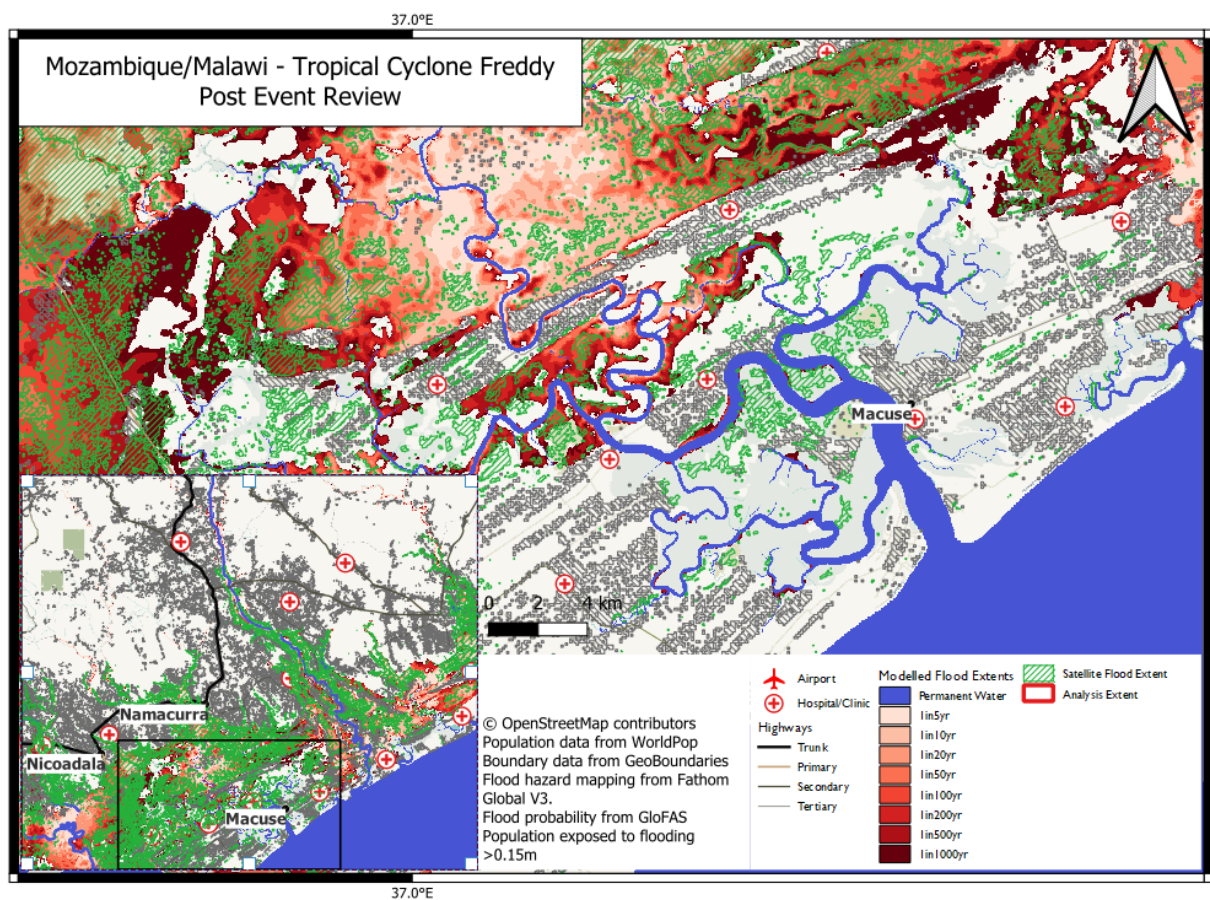

Figure S4: Return period flood extents (red), satellite derived inundation extent (Green) and major infrastructure around Macuse.

# UNOSAT 3529 Southern Region, Malawi. Situation at 14/03/2023 at 03:10 UTC

Release Date: 2023-03-14

Post-event image: RADARSAT Constellation Mission Imagery © Government of Canada (2023) - RADARSAT is an official mark of the Canadian Space Agency (acquired on 14/03/2023 at 03:10 UTC).

Scope: Southern Malawi

**Table S2: Exposure by district for Mozambique as observed on 14/03/2023 by RADARSAT. From left to right columns indicate: administrative district; country; total population of district; the best estimate (BE) of return period in the district given the median return period forecast by GloFAS rounded to the nearest available fathom flood map return period; the reasonable worst case (RWC) given the highest return period forecast (capped at 1 in 100 year); population exposure to the remotely sensed data; and population exposure to fathom return period, where closest to the remote sensing is highlighted in bold and GloFAS best estimates and reasonable worst cases are highlighted in blue and red, respectively.**

| District                 | Country | Population | Final Estimate as of 2023-03-13 |        | Exposure from Satellite Extents | Fathom Global Flood Model Fluvial Exposure Estimates by Return Period |             |             |             |        |        |        |              |
|--------------------------|---------|------------|---------------------------------|--------|---------------------------------|-----------------------------------------------------------------------|-------------|-------------|-------------|--------|--------|--------|--------------|
|                          |         |            | BE                              | RWC    |                                 | 1in5                                                                  | 1in10       | 1in20       | 1in50       | 1in100 | 1in200 | 1in500 | 1in1000      |
| Phalombe                 | MWI     | 419529     |                                 |        | 14938                           | 1790                                                                  | 4295        | 5975        | 7829        | 9330   | 10762  | 12819  | <b>14112</b> |
| Mulanje                  | MWI     | 672064     | 1in20                           | 1in50  | 5599                            | 447                                                                   | 690         | 919         | 1427        | 1992   | 2782   | 4100   | <b>5271</b>  |
| Milange - Rio Shire      | MOZ     | 590774     | 1in20                           | 1in50  | 4860                            | 456                                                                   | 805         | 1117        | 1625        | 1998   | 2381   | 3122   | <b>3890</b>  |
| Chikwawa                 | MWI     | 459216     | 1in20                           | 1in50  | 4144                            | <b>10942</b>                                                          | 19536       | 25727       | 31613       | 35519  | 39817  | 45371  | 49385        |
| Zomba                    | MWI     | 678840     |                                 |        | 3703                            | 1934                                                                  | 3003        | <b>3621</b> | <b>4573</b> | 5406   | 6258   | 7281   | 8082         |
| Nsanje                   | MWI     | 304132     | 1in200                          | 1in500 | 3456                            | <b>8688</b>                                                           | 10803       | 13278       | 15668       | 17062  | 18303  | 20075  | 21341        |
| Morrumbala               | MOZ     | 257569     | 1in200                          | 1in500 | 2842                            | <b>1627</b>                                                           | <b>3710</b> | 6265        | 10301       | 12712  | 14835  | 17606  | 19875        |
| Molumbo - Zambezi Region | MOZ     | 35666      |                                 |        | 438                             | 3                                                                     | 12          | 24          | 42          | 54     | 66     | 83     | <b>98</b>    |
| Molumbo - Zambezi Region | MOZ     | 53077      |                                 |        | 438                             | 4                                                                     | 13          | 25          | 43          | 55     | 67     | 84     | <b>99</b>    |
| Chiradzulu               | MWI     | 363845     | 1in20                           | 1in50  | 400                             | 69                                                                    | 87          | 104         | 122         | 146    | 164    | 186    | <b>212</b>   |
| Thyolo                   | MWI     | 806094     | 1in20                           | 1in50  | 277                             | 203                                                                   | <b>238</b>  | <b>313</b>  | 375         | 422    | 495    | 604    | 722          |
| Blantyre                 | MWI     | 1290825    |                                 |        | 43                              | <b>1158</b>                                                           | 1415        | 1556        | 1774        | 1916   | 2059   | 2202   | 2298         |



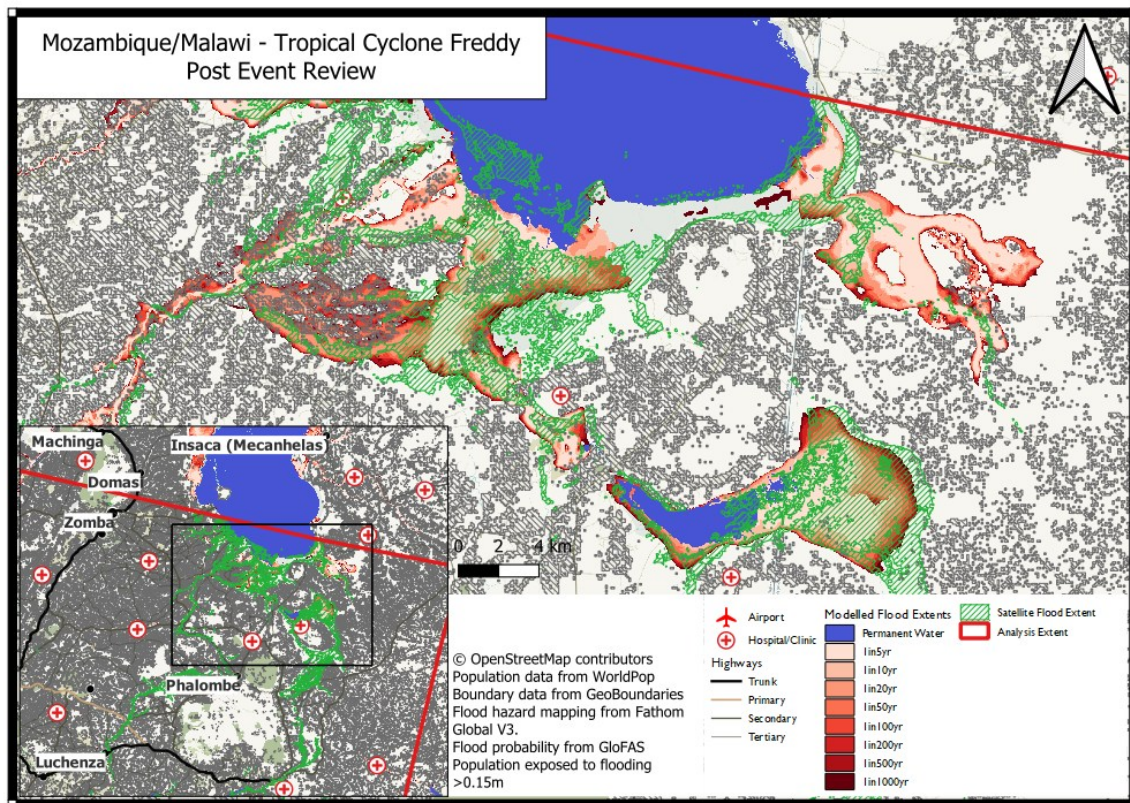

Figure S5: Return period flood extents (red), satellite derived inundation extent (Green) and major infrastructure around Phalombe state.

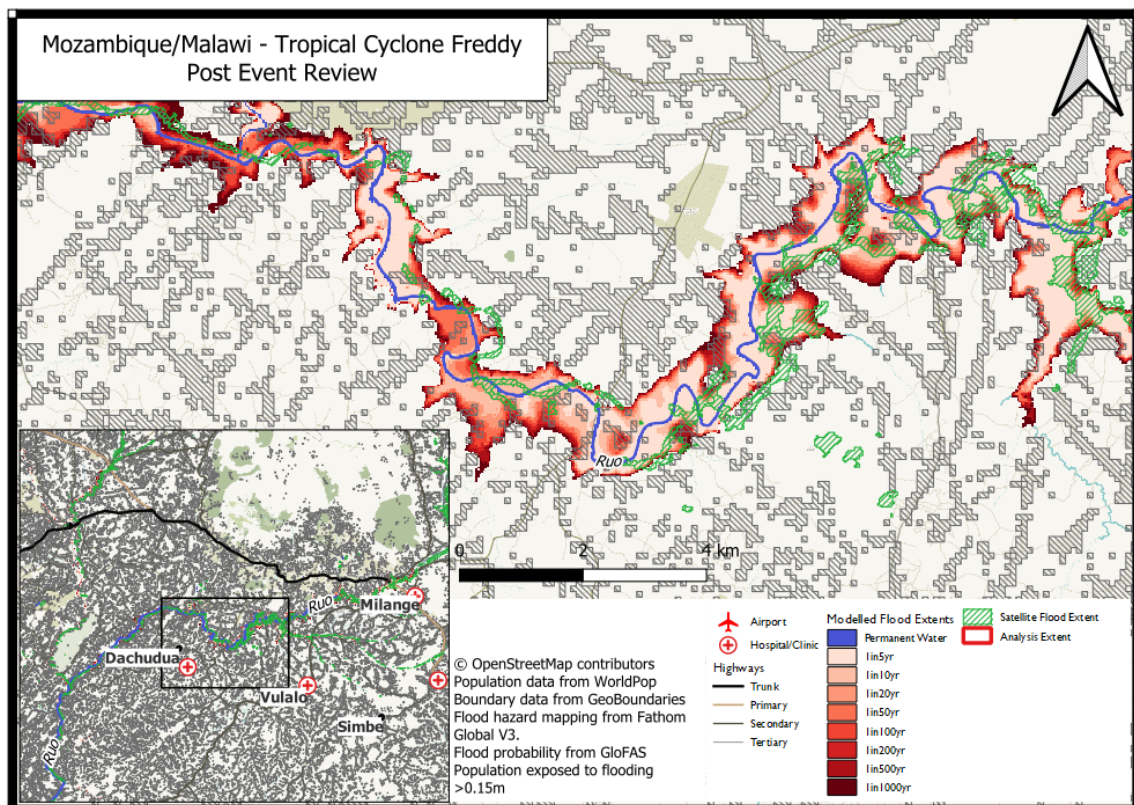

Figure S6: Return period flood extents (red), satellite derived inundation extent (Green) and major infrastructure near Dachudua on the Malawi-Mozambique boarder.



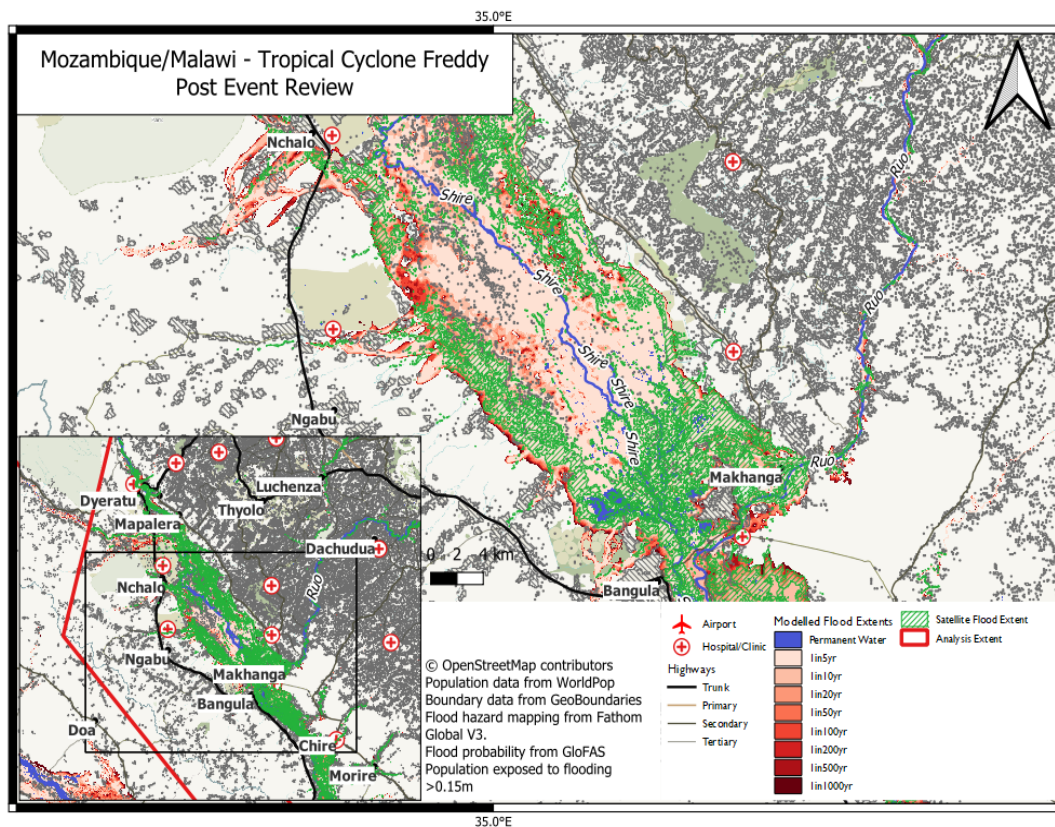

Figure S7: Return period flood extents (red), satellite derived inundation extent (Green) and major infrastructure around Makhanga.

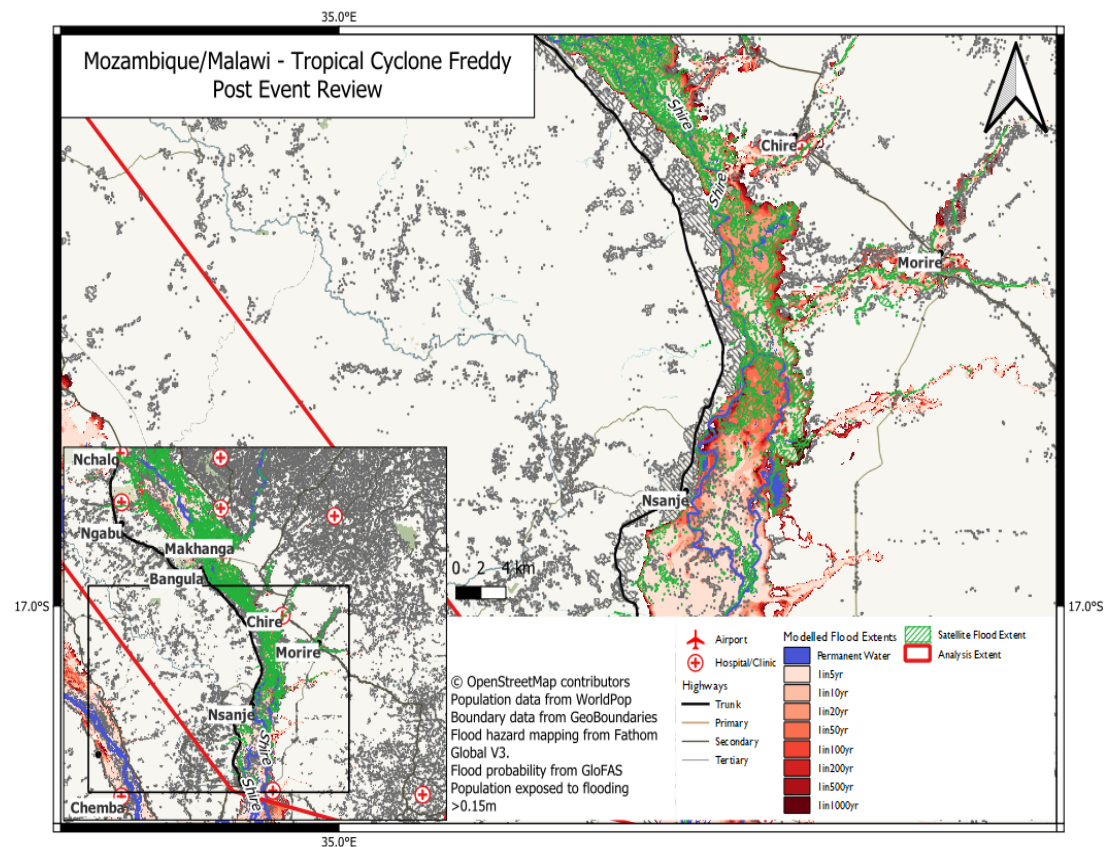

Figure S8: Return period flood extents (red), satellite derived inundation extent (Green) and major infrastructure around Chire, Morire and Nsanje.

# Copernicus EMSR654 Quelimane Release 1. Situation at 14/03/2023 at 14:47 UTC

Release Date: 2023-03-15 05:34

Post-event image: COSMO-SkyMed© ASI (2023), distributed by e-GEOS S.p.A. (acquired on 14/03/2023 at 14:47 UTC, GSD100.0m), provided under COPERNICUS by the European Union and ESA, all rights reserved.

Scope: Quelimane area - Region between the Zambezi River Mouth and Pebane Town

**Table S3: Exposure by district for Mozambique as observed on 14/03/2023 by COSMO-SkyMed. From left to right columns indicate: administrative district; country; total population of district; the best estimate (BE) of return period in the district given the median return period forecast by GloFAS rounded to the nearest available fathom flood map return period; the reasonable worst (RWC) case given the highest return period forecast (capped at 1 in 100 year); population exposure to the remotely sensed data; and population exposure to fathom return period, where closest to the remote sensing is highlighted in bold and GloFAS best estimates and reasonable worst cases are highlighted in blue and red, respectively.**

| District                | Country | Population | Final Estimate as of 2023-03-13 |         | Exposure from Satellite Extents | Fathom Global Flood Model Fluvial Exposure Estimates by Return Period |       |             |             |        |              |              |             |
|-------------------------|---------|------------|---------------------------------|---------|---------------------------------|-----------------------------------------------------------------------|-------|-------------|-------------|--------|--------------|--------------|-------------|
|                         |         |            | BE                              | RWC     |                                 | 1in5                                                                  | 1in10 | 1in20       | 1in50       | 1in100 | 1in200       | 1in500       | 1in1000     |
| Nicoadala               | MOZ     | 152158     | 1in500                          | 1in1000 | 13184                           | 1076                                                                  | 2178  | 3323        | 5109        | 7606   | <b>10961</b> | <b>15391</b> | 18462       |
| Namacurra - Namacurra   | MOZ     | 156062     | 1in500                          | 1in1000 | 5422                            | 771                                                                   | 1452  | 2033        | 2931        | 3558   | 3899         | 4406         | <b>4947</b> |
| Maganja Da Costa        | MOZ     | 177295     | 1in200                          | 1in500  | 2951                            | 305                                                                   | 965   | <b>1784</b> | <b>3264</b> | 4086   | 4987         | 6698         | 7756        |
| Inhassunge              | MOZ     | 49175      | 1in500                          | 1in1000 | 1848                            | 27                                                                    | 103   | 147         | 196         | 381    | 655          | 733          | <b>807</b>  |
| Namacurra - Rio Lucungo | MOZ     | 60300      | 1in200                          | 1in500  | 1714                            | 431                                                                   | 873   | <b>1393</b> | <b>1866</b> | 2589   | 3375         | 4484         | 5167        |
| Mopeia                  | MOZ     | 18853      | 1in500                          | 1in1000 | 644                             | 215                                                                   | 391   | <b>622</b>  | 1134        | 1880   | 2544         | 3069         | 3304        |
| Mocuba - Rio Licungo    | MOZ     | 4821       | 1in200                          | 1in500  | 23                              | <b>32</b>                                                             | 40    | 48          | 52          | 54     | 54           | 54           | 55          |
| Maquival                | MOZ     | 111862     | 1in500                          | 1in1000 | 5                               | <b>65</b>                                                             | 143   | 229         | 313         | 381    | 489          | 614          | 770         |
| Mocubela                | MOZ     | 5618       | 1in200                          | 1in500  | 3                               | <b>24</b>                                                             | 103   | 319         | 507         | 777    | 859          | 903          | 934         |
| Cidade De Quelimane     | MOZ     | 267158     | 1in500                          | 1in1000 | 0                               | <b>9172</b>                                                           | 14544 | 17160       | 19555       | 23255  | 27151        | 33439        | 36871       |



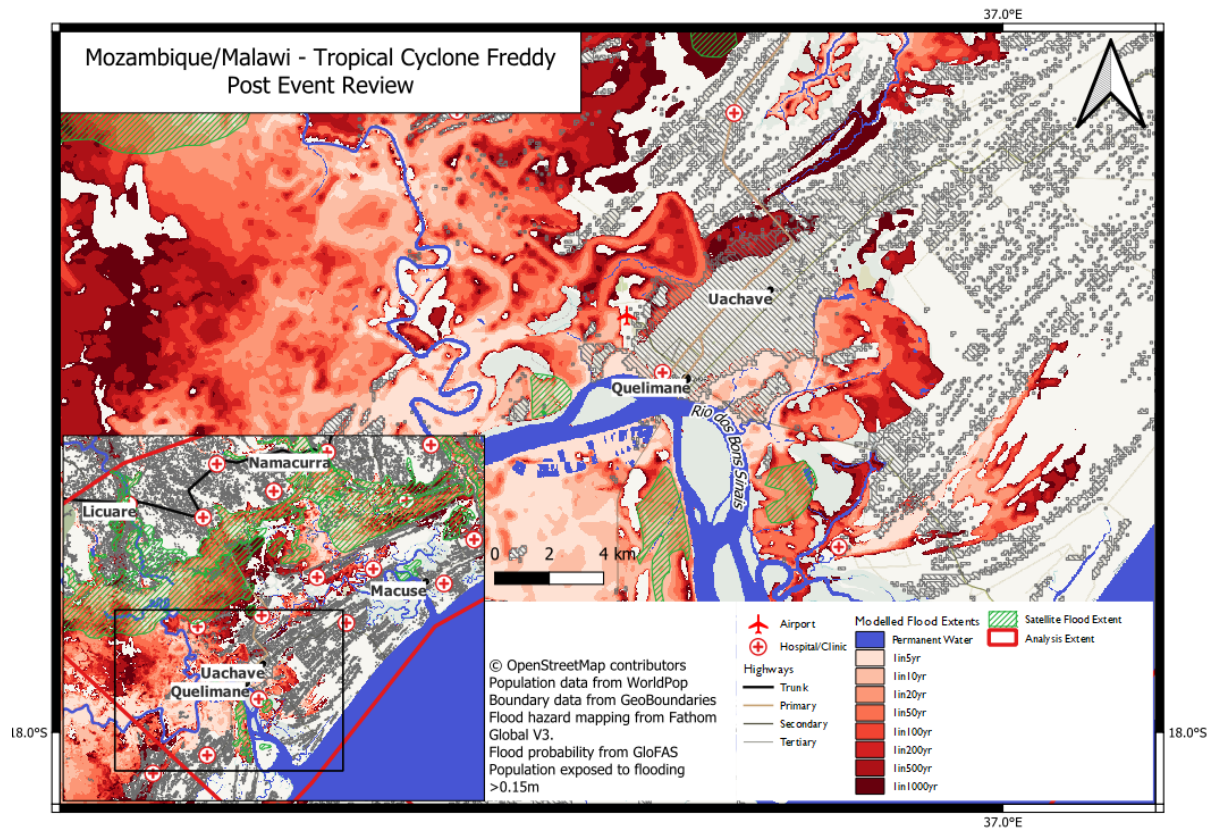

Figure S9: Return period flood extents (red), satellite derived inundation extent (Green) and major infrastructure around Qualimane.

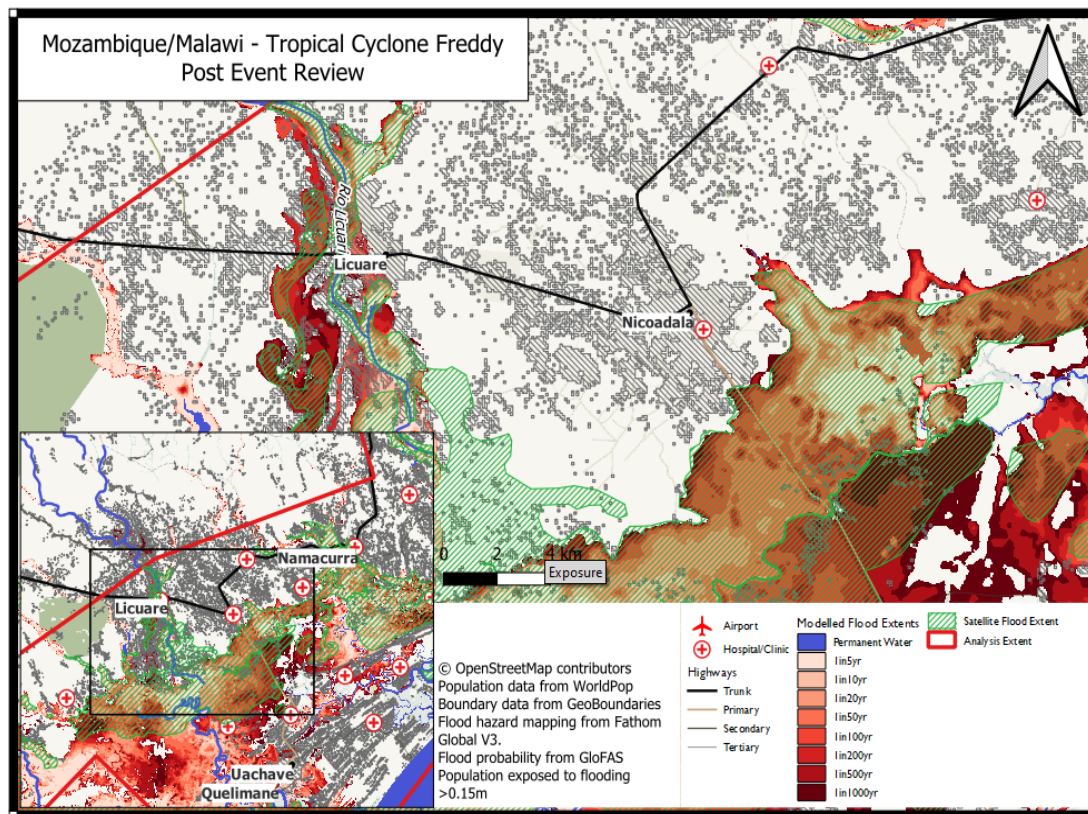

Figure S10: Return period flood extents (red), satellite derived inundation extent (Green) and major infrastructure around Licuare and Nicoadala.



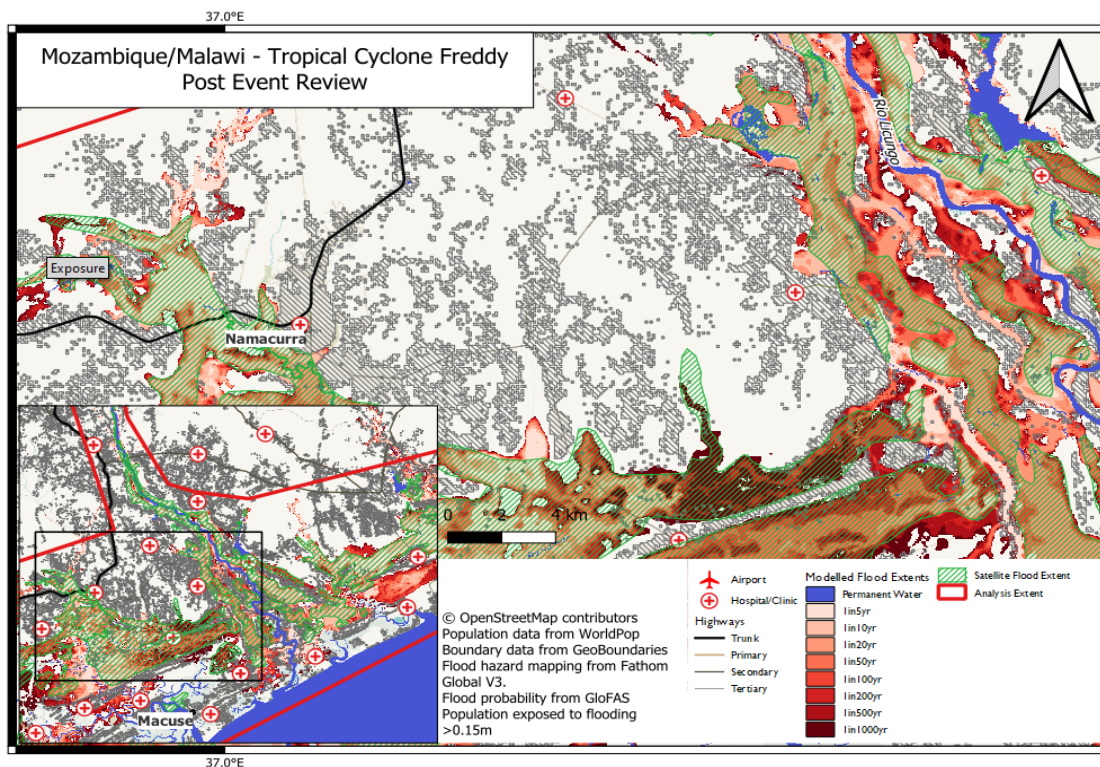

Figure S11: Return period flood extents (red), satellite derived inundation extent (Green) and major infrastructure around Namacurra.

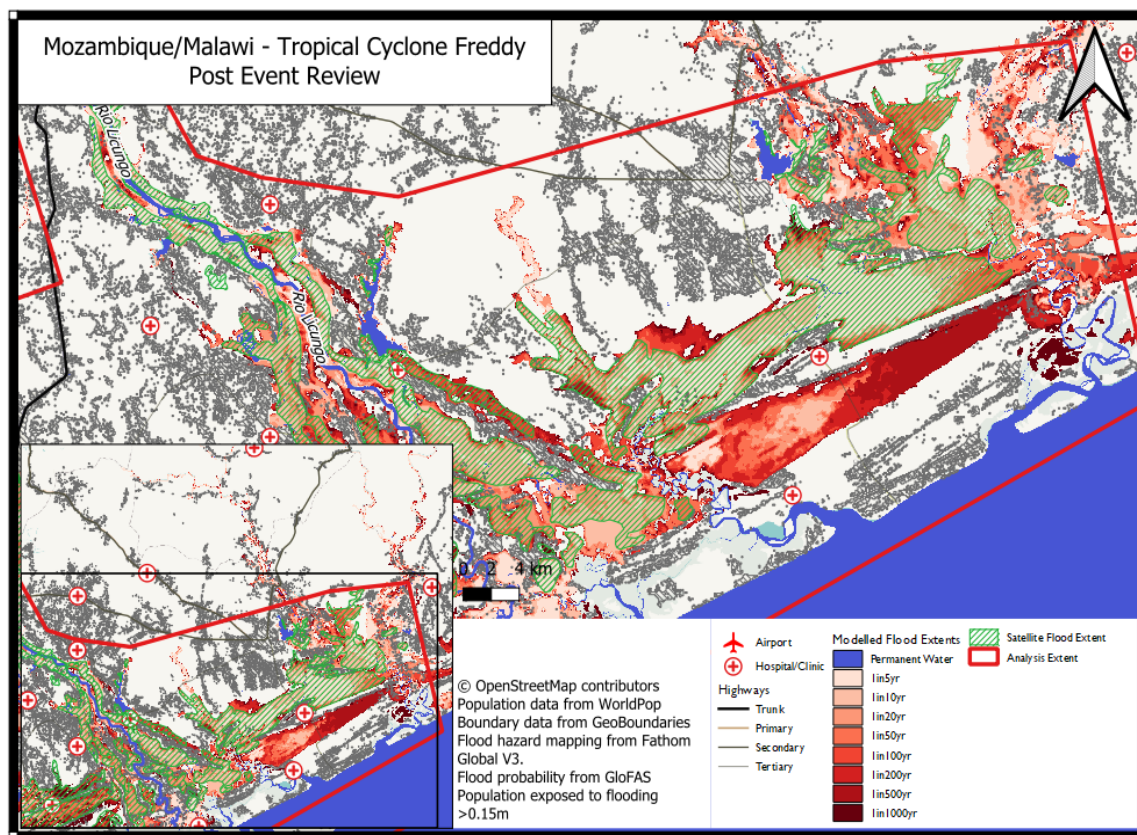

Figure S12: Return period flood extents (red), satellite derived inundation extent (Green) and major infrastructure around Rio Licungo.



# Copernicus EMSR654 Mutarara Release 1. Situation at 15/03/2023 at 03:53 UTC

Release Date: 2023-03-15 19:40

Post-event image: COSMO-SkyMed© ASI (2023), distributed by e-GEOS S.p.A. (acquired on 15/03/2023 at 03:53 UTC, GSD100.0m), provided under COPERNICUS by the European Union and ESA, all rights reserved.

Scope: Mopeia Town upstream along Zambezi and Chire Rivers

**Table S4: Exposure by district for Mozambique as observed on 15/03/2023 by COSMO-SkyMed. From left to right columns indicate: administrative district; country; total population of district; the best estimate (BE) of return period in the district given the median return period forecast by GloFAS rounded to the nearest available fathom flood map return period; the reasonable worst (RWC) case given the highest return period forecast (capped at 1 in 100 year); population exposure to the remotely sensed data; and population exposure to fathom return period, where closest to the remote sensing is highlighted in bold and GloFAS best estimates and reasonable worst cases are highlighted in blue and red, respectively.**

| District                   | Country | Population | Final Estimate as of 2023-03-13 |         | Exposure from Satellite Extents | Fathom Global Flood Model Fluvial Exposure Estimates by Return Period |           |           |       |              |              |        |         |
|----------------------------|---------|------------|---------------------------------|---------|---------------------------------|-----------------------------------------------------------------------|-----------|-----------|-------|--------------|--------------|--------|---------|
|                            |         |            | BE                              | RWC     |                                 | 1in5                                                                  | 1in10     | 1in20     | 1in50 | 1in100       | 1in200       | 1in500 | 1in1000 |
| Morrumbala                 | MOZ     | 79329      | 1in200                          | 1in500  | 15021                           | 1983                                                                  | 4021      | 6714      | 11016 | <b>13574</b> | <b>15787</b> | 18663  | 21044   |
| Mopeia - Zambezi Region    | MOZ     | 40347      |                                 |         | 825                             | <b>6536</b>                                                           | 11185     | 14514     | 17026 | 18115        | 18928        | 19738  | 20368   |
| Caia - Zambezi Region      | MOZ     | 95644      |                                 |         | 807                             | <b>15130</b>                                                          | 28007     | 36246     | 42268 | 45231        | 47253        | 50366  | 55635   |
| Nsanje                     | MWI     | 679        | 1in200                          | 1in500  | 526                             | 59                                                                    | 178       | 316       | 451   | <b>526</b>   | 556          | 578    | 594     |
| Mutarara - Not Zambezi     | MOZ     | 36369      | 1in200                          | 1in500  | 443                             | <b>5574</b>                                                           | 9392      | 13660     | 19023 | 22670        | 26773        | 28073  | 29178   |
| Mopeia - Not Zambezi       | MOZ     | 33646      | 1in500                          | 1in1000 | 319                             | <b>623</b>                                                            | 1605      | 2191      | 2643  | 2917         | 3226         | 3585   | 3857    |
| Doa - Zambezi Region       | MOZ     | 15196      |                                 |         | 202                             | <b>2377</b>                                                           | 2868      | 3501      | 4749  | 5445         | 6046         | 6563   | 7159    |
| Caia - Not Zambezi         | MOZ     | 26229      | 1in500                          | 1in1000 | 149                             | <b>1787</b>                                                           | 6092      | 9812      | 13045 | 14064        | 14576        | 15058  | 15499   |
| Mutarara - Zambezi Region  | MOZ     | 50831      |                                 |         | 91                              | <b>4531</b>                                                           | 9830      | 13396     | 16206 | 18142        | 19885        | 21967  | 24254   |
| Doa - Not Zambezi          | MOZ     | 20636      | 1in20                           | 1in50   | 36                              | 19                                                                    | <b>30</b> | <b>55</b> | 127   | 192          | 320          | 514    | 782     |
| Cheringoma - Inland Region | MOZ     | 1791       | 1in500                          | 1in1000 | 15                              | <b>90</b>                                                             | 102       | 114       | 139   | 157          | 187          | 277    | 319     |

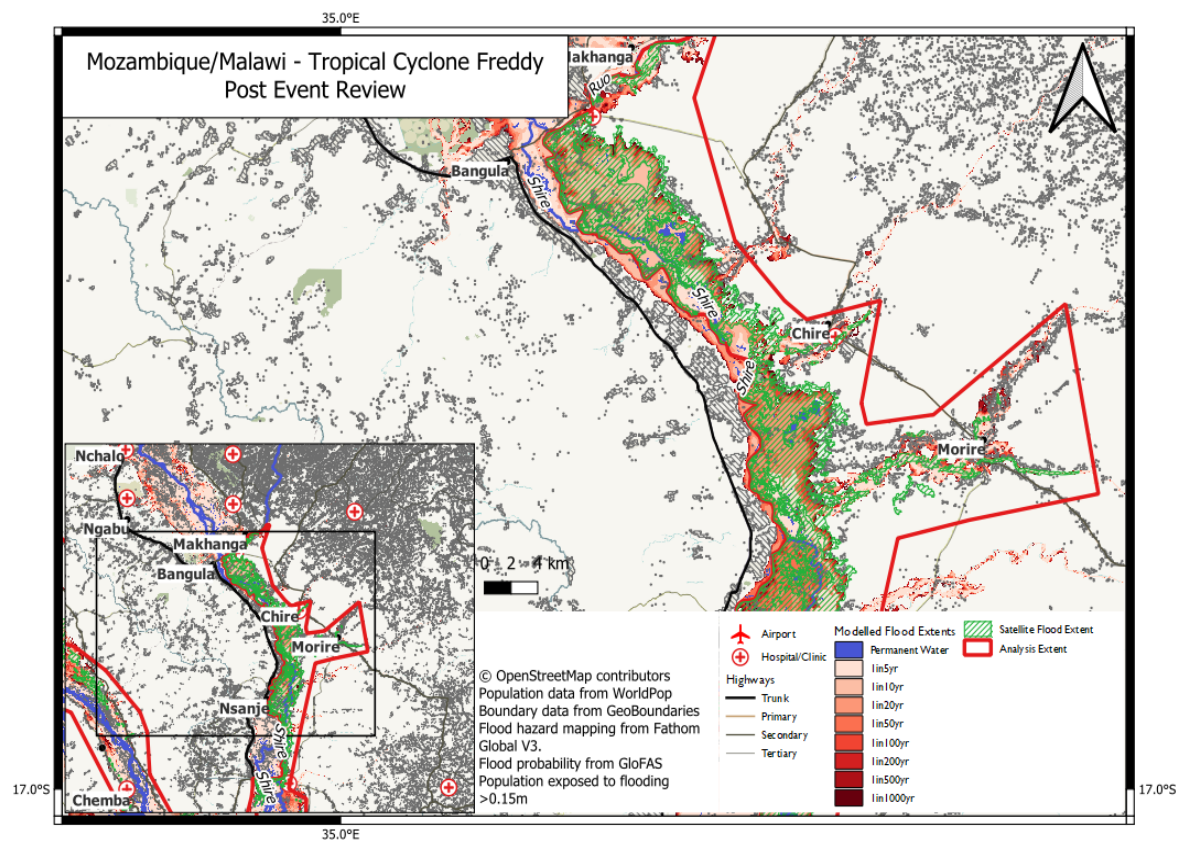

Figure S13: Return period flood extents (red), satellite derived inundation extent (Green) and major infrastructure around the Shire River, Southern Malawi.

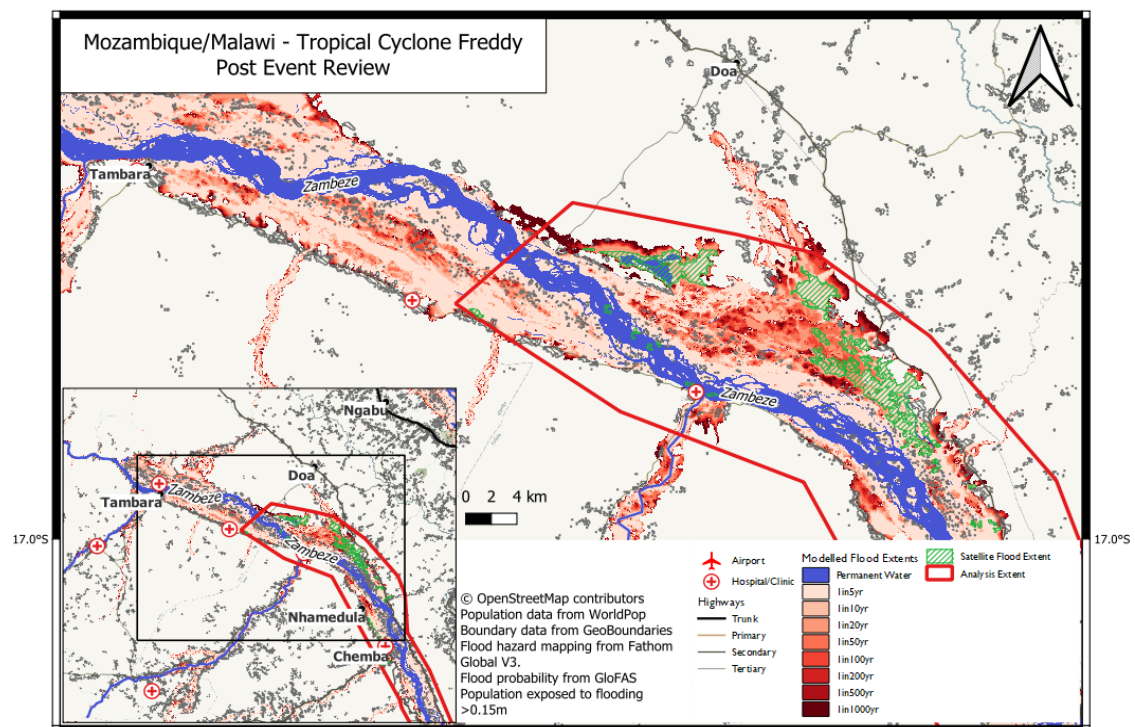

Figure S14: Return period flood extents (red), satellite derived inundation extent (Green) and major infrastructure around the Zambezi River, Mozambique.

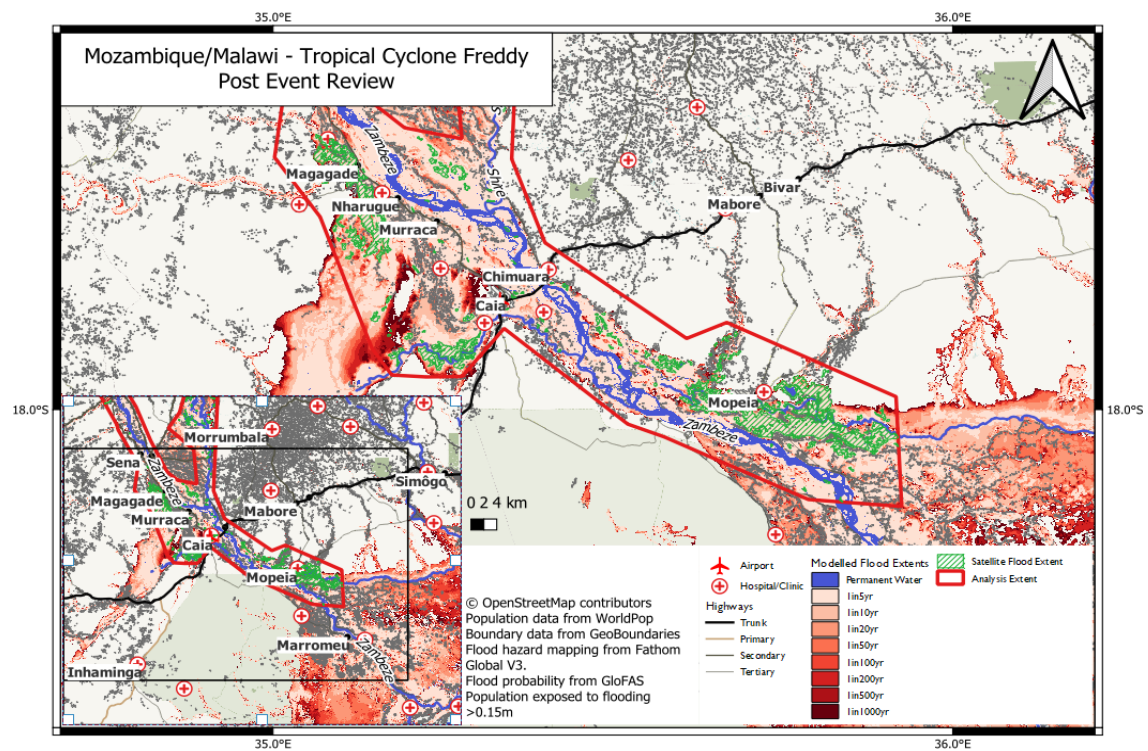

**Figure S15: Return period flood extents (red), satellite derived inundation extent (Green) and major infrastructure around the Zambezi River near Mopeia, Mozambique.**

## Copernicus EMSR654 Mutarara Monitoring 1. Situation at 16/03/2023 at 03:09 UTC

Release Date: 2023-03-16 14:11

Post-event image: RADARSAT 2 Data and products © Mac Donald, Dettwiler and Associates Ltd. (2023). (acquired on 16/03/2023 at 03:09 UTC, GSD100.0m) - RADARSAT is an official mark of the Canadian Space Agency - provided under COPERNICUS by the European Union and ESA, all rights reserved.

Scope: Mopeia Town upstream along Zambezi and Chire Rivers

**Table S5: Exposure by district for Mozambique as observed on 16/03/2023 by RADARSAT. From left to right columns indicate: administrative district; country; total population of district; the best estimate (BE) of return period in the district given the median return period forecast by GloFAS rounded to the nearest available fathom flood map return period; the reasonable worst case (RWC) given the highest return period forecast (capped at 1 in 100 year); population exposure to the remotely sensed data; and population exposure to fathom return period, where closest to the remote sensing is highlighted in bold and GloFAS best estimates and reasonable worst cases are highlighted in blue and red, respectively.**

| District                  | Country | Population | Final Estimate as of 2023-03-13 |         | Exposure from Satellite Extents | Fathom Global Flood Model Fluvial Exposure Estimates by Return Period |       |       |       |        |        |        |         |
|---------------------------|---------|------------|---------------------------------|---------|---------------------------------|-----------------------------------------------------------------------|-------|-------|-------|--------|--------|--------|---------|
|                           |         |            | BE                              | RWC     |                                 | 1in5                                                                  | 1in10 | 1in20 | 1in50 | 1in100 | 1in200 | 1in500 | 1in1000 |
| Morrumbala                | MOZ     | 79329      | 1in200                          | 1in500  | 16380                           | 1983                                                                  | 4021  | 6714  | 11016 | 13574  | 15787  | 18663  | 21044   |
| Mutarara - Not Zambezi    | MOZ     | 36369      | 1in200                          | 1in500  | 4665                            | 5574                                                                  | 9392  | 13660 | 19023 | 22670  | 26773  | 28073  | 29178   |
| Mopeia - Zambezi Region   | MOZ     | 40347      |                                 |         | 926                             | 6536                                                                  | 11185 | 14514 | 17026 | 18115  | 18928  | 19738  | 20368   |
| Caia - Zambezi Region     | MOZ     | 95644      |                                 |         | 922                             | 15130                                                                 | 28007 | 36246 | 42268 | 45231  | 47253  | 50366  | 55635   |
| Nsanje                    | MWI     | 679        | 1in200                          | 1in500  | 549                             | 59                                                                    | 178   | 316   | 451   | 526    | 556    | 578    | 594     |
| Mopeia - Not Zambezi      | MOZ     | 33646      | 1in500                          | 1in1000 | 370                             | 623                                                                   | 1605  | 2191  | 2643  | 2917   | 3226   | 3585   | 3857    |
| Caia - Not Zambezi        | MOZ     | 26229      | 1in500                          | 1in1000 | 246                             | 1787                                                                  | 6092  | 9812  | 13045 | 14064  | 14576  | 15058  | 15499   |
| Doa - Zambezi Region      | MOZ     | 15196      |                                 |         | 216                             | 2377                                                                  | 2868  | 3501  | 4749  | 5445   | 6046   | 6563   | 7159    |
| Mutarara - Zambezi Region | MOZ     | 50831      |                                 |         | 91                              | 4531                                                                  | 9830  | 13396 | 16206 | 18142  | 19885  | 21967  | 24254   |
| Doa - Not Zambezi         | MOZ     | 20636      | 1in20                           | 1in50   | 41                              | 19                                                                    | 30    | 55    | 127   | 192    | 320    | 514    | 782     |
| Cheringoma - Inland Reg   | MOZ     | 1791       | 1in500                          | 1in1000 | 24                              | 90                                                                    | 102   | 114   | 139   | 157    | 187    | 277    | 319     |

# UNOSAT 3529 Southern Region, Malawi. Situation at 17/03/2023 at 03:03 UTC

Release Date: 2023-03-17

Post-event image: Sentinel 1 - Contains modified Copernicus Sentinel data [2023] - (acquired on 17/03/2023 at 03:03 UTC).

Scope: Southern Malawi

**Table S6: Exposure by district for Mozambique as observed on 17/03/2023 by Sentinel-1. From left to right columns indicate: administrative district; country; total population of district; the best estimate (BE) of return period in the district given the median return period forecast by GloFAS rounded to the nearest available fathom flood map return period; the reasonable worst case (RWC) given the highest return period forecast (capped at 1 in 100 year); population exposure to the remotely sensed data; and population exposure to fathom return period, where closest to the remote sensing is highlighted in bold and GloFAS best estimates and reasonable worst cases are highlighted in blue and red, respectively.**

| District                  | Country | Population | Final Estimate as of 2023-03-13 |         | Exposure from Satellite Extents | Fathom Global Flood Model Fluvial Exposure Estimates by Return Period |              |             |              |        |        |        |         |
|---------------------------|---------|------------|---------------------------------|---------|---------------------------------|-----------------------------------------------------------------------|--------------|-------------|--------------|--------|--------|--------|---------|
|                           |         |            | BE                              | RWC     |                                 | 1in5                                                                  | 1in10        | 1in20       | 1in50        | 1in100 | 1in200 | 1in500 | 1in1000 |
| Mutarara - Not Zambezi    | MOZ     | 124215     | 1in200                          | 1in500  | 11589                           | <b>6189</b>                                                           | <b>14266</b> | 27213       | 41403        | 49420  | 59080  | 67124  | 74093   |
| Morrumbala                | MOZ     | 264857     | 1in200                          | 1in500  | 9983                            | 2076                                                                  | 4232         | <b>6982</b> | <b>11338</b> | 13945  | 16226  | 19222  | 21677   |
| Nsanje                    | MWI     | 317531     | 1in200                          | 1in500  | 8625                            | <b>8688</b>                                                           | 10803        | 13278       | 15668        | 17062  | 18303  | 20075  | 21341   |
| Chikwawa                  | MWI     | 357159     | 1in20                           | 1in50   | 1668                            | <b>9885</b>                                                           | 17468        | 22984       | 28247        | 31756  | 35683  | 40749  | 44355   |
| Caia - Not Zambezi        | MOZ     | 60706      | 1in500                          | 1in1000 | 254                             | <b>1889</b>                                                           | 6263         | 10139       | 13561        | 14636  | 15201  | 15771  | 16300   |
| Mutarara - Zambezi Region | MOZ     | 77743      |                                 |         | 232                             | <b>5285</b>                                                           | 14445        | 24875       | 32669        | 36081  | 38440  | 40914  | 43424   |
| Caia - Zambezi Region     | MOZ     | 95644      |                                 |         | 159                             | <b>15130</b>                                                          | 28007        | 36246       | 42268        | 45231  | 47253  | 50366  | 55635   |
| Chemba - Zambezi Region   | MOZ     | 23107      |                                 |         | 87                              | <b>1918</b>                                                           | 2152         | 2424        | 2791         | 3140   | 3629   | 4552   | 5853    |
| Doa - Zambezi Region      | MOZ     | 8540       |                                 |         | 78                              | <b>1693</b>                                                           | 2107         | 2650        | 3822         | 4467   | 5025   | 5459   | 5715    |
| Mopeia - Zambezi Region   | MOZ     | 9944       |                                 |         | 36                              | <b>109</b>                                                            | 199          | 389         | 609          | 773    | 918    | 1170   | 1366    |
| Mopeia - Not Zambezi      | MOZ     | 18786      | 1in500                          | 1in1000 | 25                              | <b>107</b>                                                            | 147          | 176         | 210          | 242    | 276    | 315    | 349     |
| Cheringoma - Inland Reg   | MOZ     | 7292       | 1in500                          | 1in1000 | 20                              | <b>142</b>                                                            | 167          | 196         | 234          | 282    | 326    | 448    | 529     |
| Thyolo                    | MWI     | 806094     | 1in20                           | 1in50   | 16                              | <b>203</b>                                                            | 238          | 313         | 375          | 422    | 495    | 604    | 722     |
| Mulanje                   | MWI     | 613417     | 1in20                           | 1in50   | 15                              | <b>394</b>                                                            | 619          | 833         | 1301         | 1828   | 2564   | 3774   | 4807    |
| Doa - Not Zambezi         | MOZ     | 110883     | 1in20                           | 1in50   | 12                              | <b>81</b>                                                             | 146          | 187         | 283          | 350    | 494    | 701    | 988     |
| Blantyre                  | MWI     | 1051856    |                                 |         | 2                               | <b>15</b>                                                             | 15           | 15          | 15           | 15     | 18     | 19     | 19      |



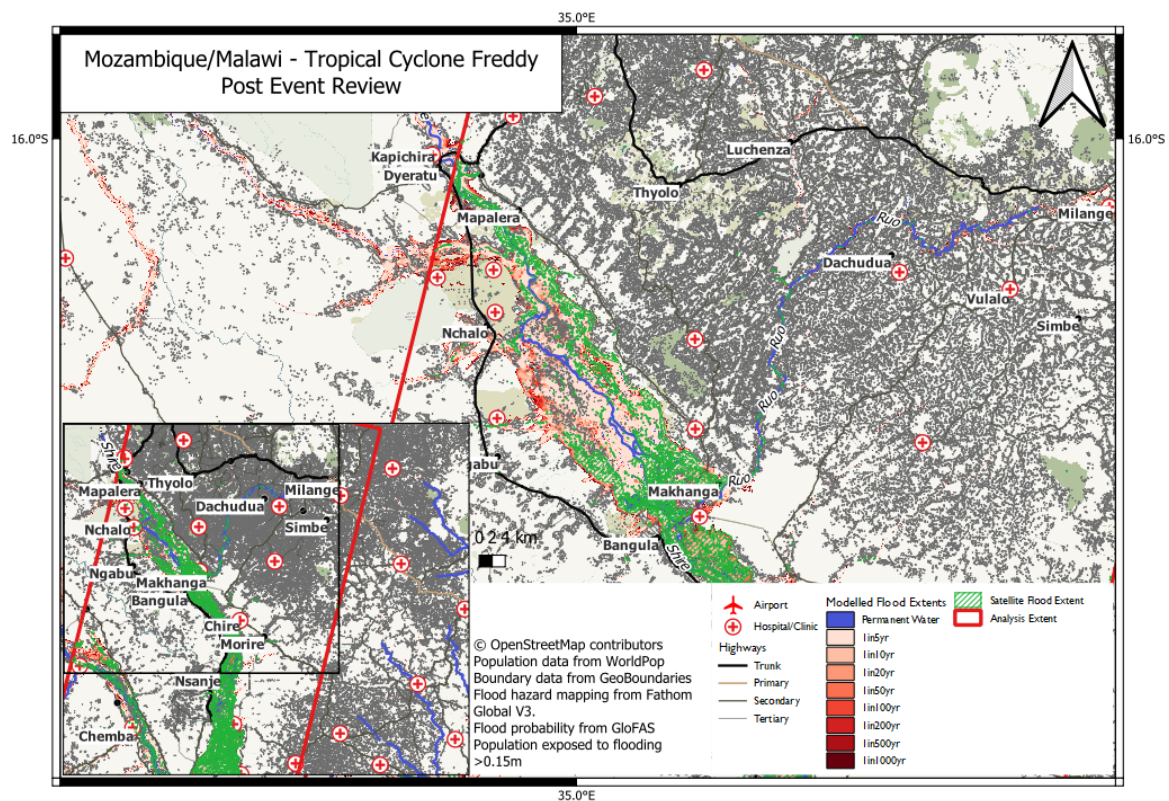

Figure S16: Return period flood extents (red), satellite derived inundation extent (Green) and major infrastructure north of Makhanga and the Ruvo River confluence with the Shire River.

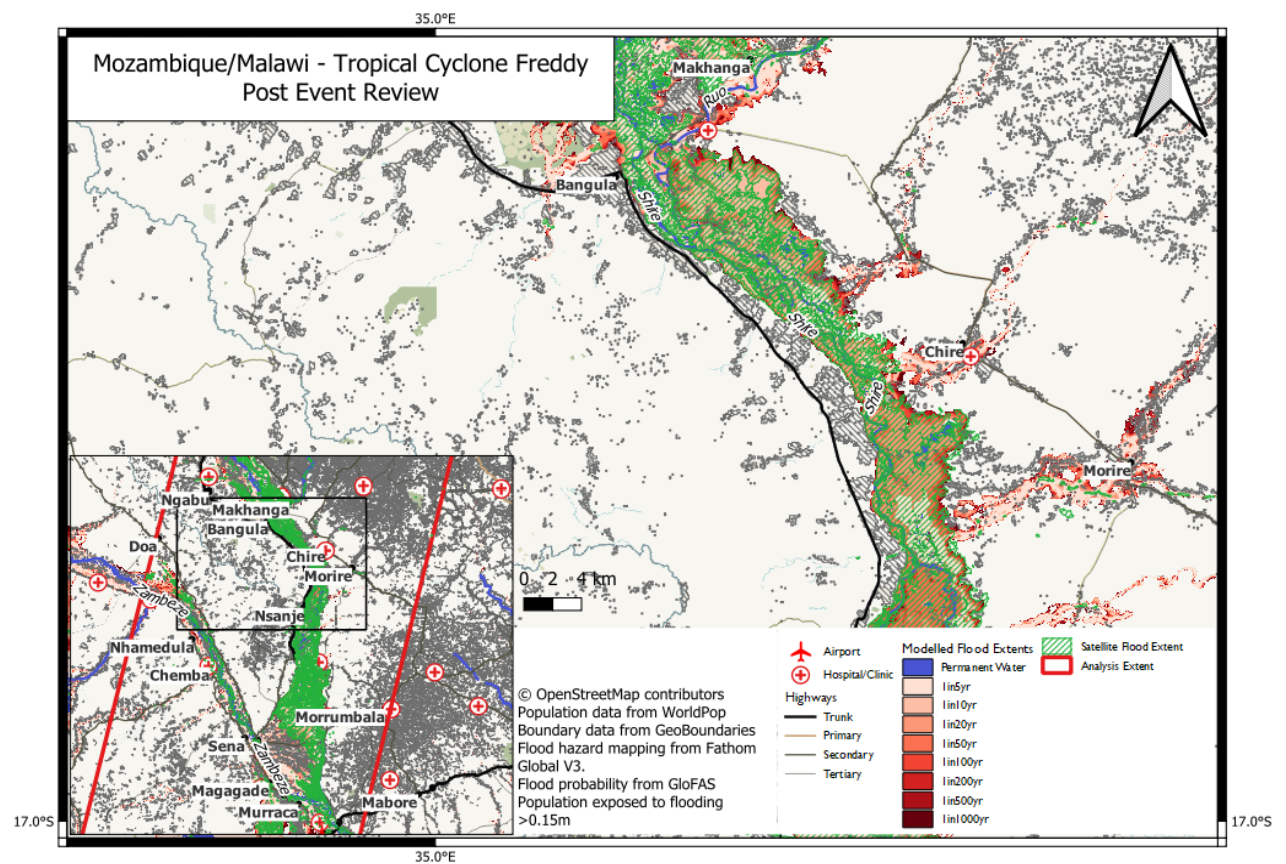

Figure S17: Return period flood extents (red), satellite derived inundation extent (Green) and major infrastructure along the Shire River from Makhanga to Chire



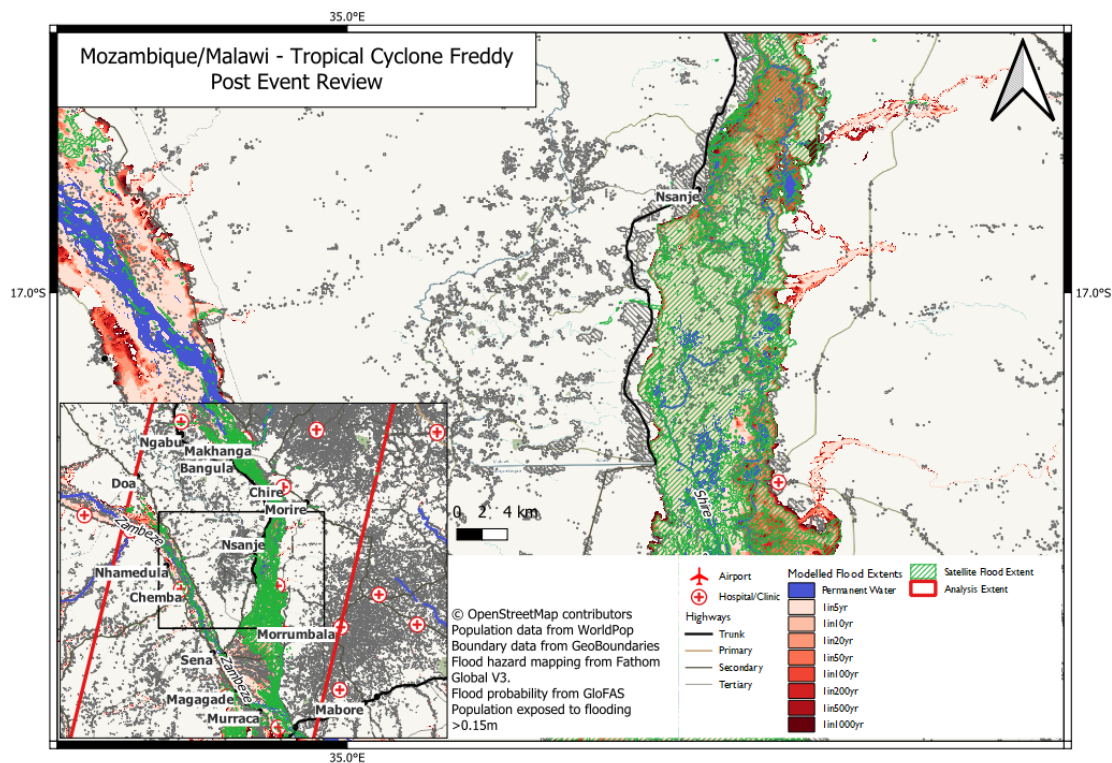

Figure S18: Return period flood extents (red), satellite derived inundation extent (Green) and major infrastructure along the Shire River around Nsanje.

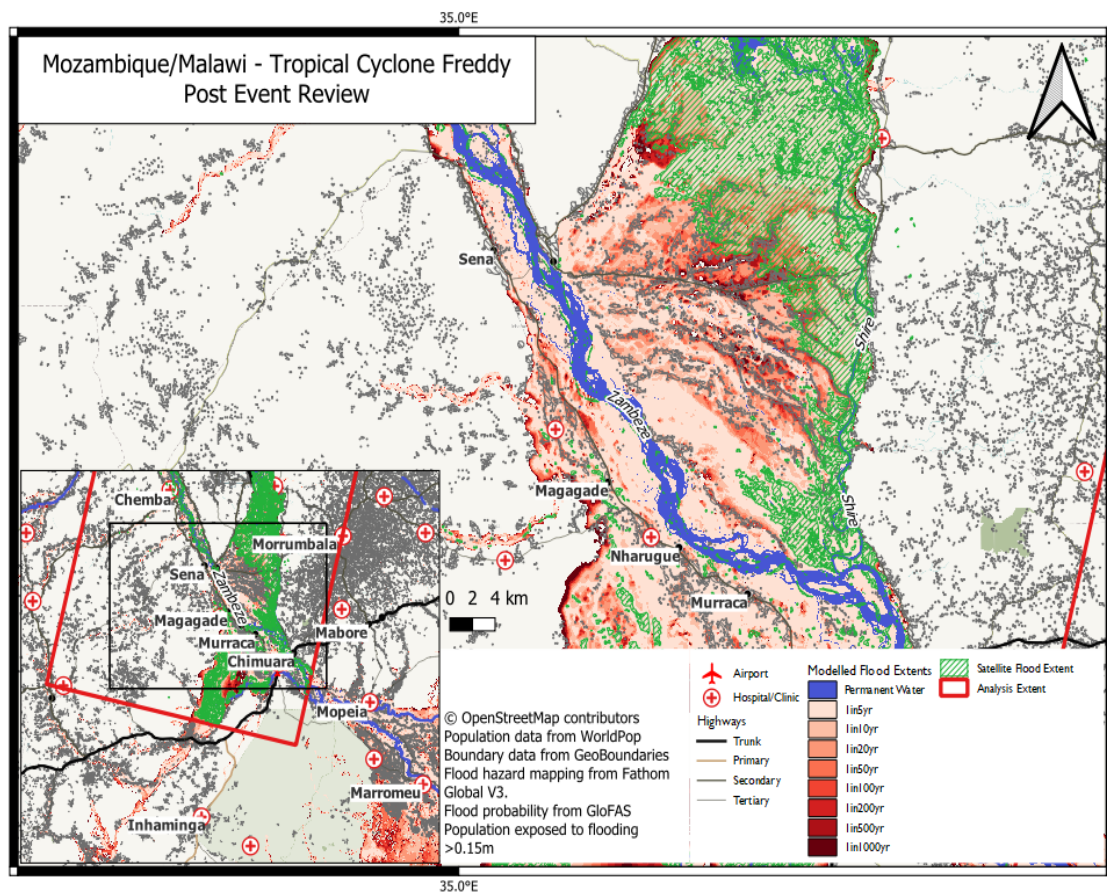

Figure S19: Return period flood extents (red), satellite derived inundation extent (Green) and major infrastructure at the Shire River and Zambeze River confluence.

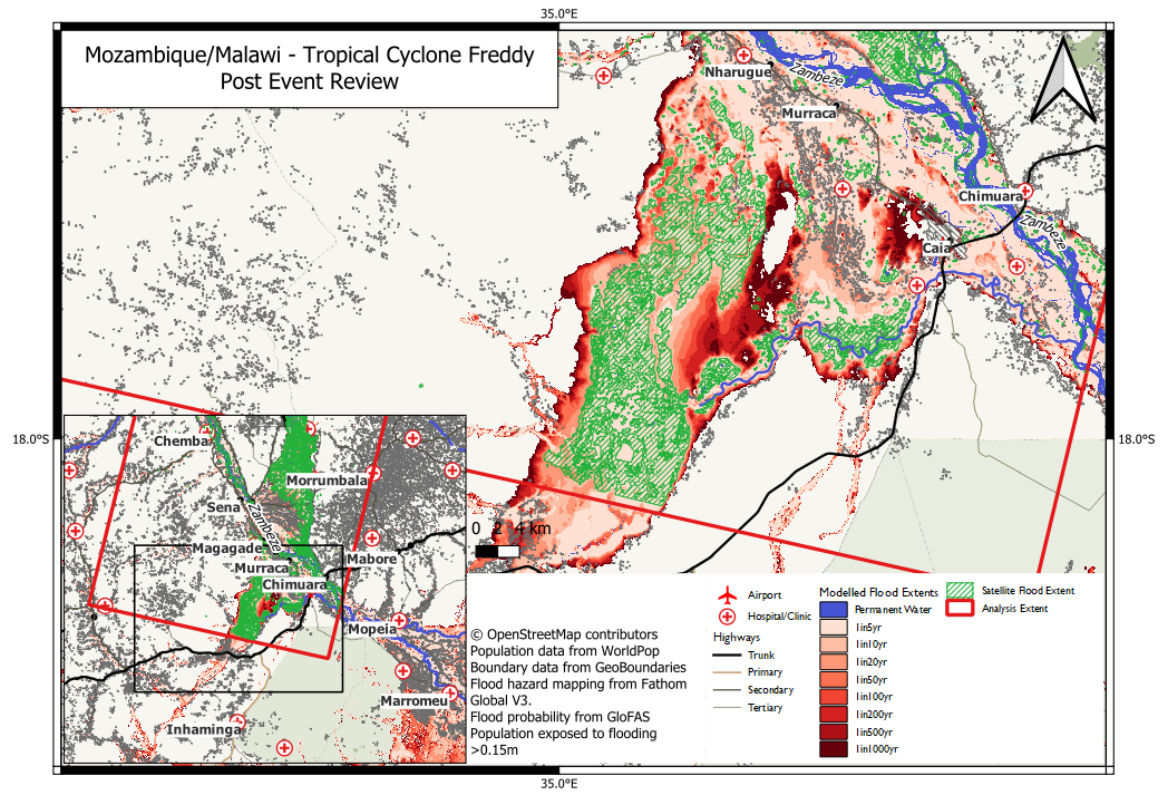

Figure S20: Return period flood extents (red), satellite derived inundation extent (Green) and major infrastructure South of the Zambeze River near Caia.



# UNOSAT 3528 Sofala and Zambezia districts. Situation at 17/03/2023 at 03:03 UTC

Release Date: 2023-03-17

Post-event image: Sentinel 1 - Contains modified Copernicus Sentinel data [2023] - (acquired on 17/03/2023 at 03:03 UTC).

Scope: Quelimane area - Region between Zambezi River Mouth and Pebane Town

**Table S7: Exposure by district for Mozambique as observed on 17/03/2023 by Sentinel-1. From left to right columns indicate: administrative district; country; total population of district; the best estimate (BE) of return period in the district given the median return period forecast by GloFAS rounded to the nearest available fathom flood map return period; the reasonable worst case (RWC) given the highest return period forecast (capped at 1 in 100 year); population exposure to the remotely sensed data; and population exposure to fathom return period, where closest to the remote sensing is highlighted in bold and GloFAS best estimates and reasonable worst cases are highlighted in blue and red, respectively.**

|                         |         |            | Final Estimate as of 2023-03-13 |         |                                 | Fathom Global Flood Model Fluvial Exposure Estimates by Return Period |             |             |            |             |              |        |           |
|-------------------------|---------|------------|---------------------------------|---------|---------------------------------|-----------------------------------------------------------------------|-------------|-------------|------------|-------------|--------------|--------|-----------|
| District                | Country | Population | BE                              | RWC     | Exposure from Satellite Extents | 1in5                                                                  | 1in10       | 1in20       | 1in50      | 1in100      | 1in200       | 1in500 | 1in1000   |
| Nicoadala               | MOZ     | 181541     | 1in500                          | 1in1000 | 8138                            | 1317                                                                  | 2458        | 3655        | 5490       | <b>8060</b> | <b>11529</b> | 16253  | 19593     |
| Namacurra - Namacurra   | MOZ     | 167612     | 1in500                          | 1in1000 | 3932                            | 790                                                                   | 1472        | 2055        | 2957       | <b>3587</b> | <b>3933</b>  | 4447   | 4994      |
| Maganja Da Costa        | MOZ     | 211994     | 1in200                          | 1in500  | 1304                            | 342                                                                   | <b>1025</b> | <b>1876</b> | 3388       | 4248        | 5185         | 6980   | 8103      |
| Namacurra - Rio Lucungo | MOZ     | 60920      | 1in200                          | 1in500  | 774                             | <b>431</b>                                                            | <b>873</b>  | 1393        | 1866       | 2589        | 3375         | 4484   | 5167      |
| Moopia - Not Zambezi    | MOZ     | 89117      | 1in500                          | 1in1000 | 652                             | <b>2305</b>                                                           | 5763        | 9366        | 14332      | 18416       | 22304        | 26890  | 31573     |
| Inhassunge              | MOZ     | 96032      | 1in500                          | 1in1000 | 324                             | 27                                                                    | 103         | 147         | <b>226</b> | <b>458</b>  | 776          | 918    | 1816      |
| Maquival                | MOZ     | 111862     | 1in500                          | 1in1000 | 188                             | 65                                                                    | <b>143</b>  | <b>229</b>  | 313        | 381         | 489          | 614    | 770       |
| Mocubela                | MOZ     | 90933      | 1in200                          | 1in500  | 150                             | <b>117</b>                                                            | <b>223</b>  | 459         | 676        | 974         | 1079         | 1171   | 1238      |
| Chinde                  | MOZ     | 83070      |                                 |         | 101                             | <b>6123</b>                                                           | 10651       | 12850       | 15665      | 17128       | 18745        | 20422  | 23324     |
| Pebane                  | MOZ     | 48797      |                                 |         | 35                              | 11                                                                    | 13          | 13          | 15         | 20          | 25           | 29     | <b>33</b> |
| Cidade De Quelimane     | MOZ     | 267158     | 1in500                          | 1in1000 | 25                              | <b>9172</b>                                                           | 14544       | 17160       | 19555      | 23255       | 27151        | 33439  | 36871     |
| Mocuba - Rio Licungo    | MOZ     | 74092      | 1in200                          | 1in500  | 12                              | <b>182</b>                                                            | 222         | 249         | 281        | 311         | 336          | 360    | 405       |
| Derre                   | MOZ     | 33445      | 1in500                          | 1in1000 | 10                              | <b>46</b>                                                             | 50          | 55          | 65         | 76          | 89           | 111    | 149       |
| Luabo                   | MOZ     | 31226      |                                 |         | 7                               | <b>6246</b>                                                           | 10701       | 15461       | 19717      | 21921       | 23586        | 25218  | 26412     |
| Moopia - Zambezi Region | MOZ     | 377        |                                 |         | 0                               | <b>76</b>                                                             | 175         | 287         | 334        | 341         | 358          | 366    | 370       |

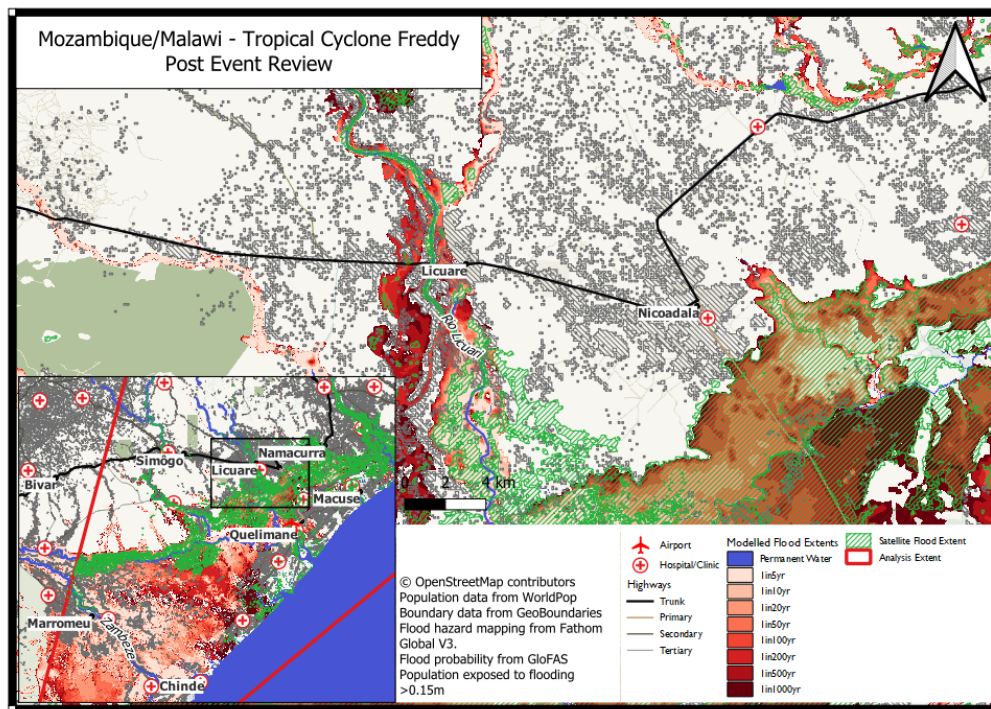

Figure S21: Return period flood extents (red), satellite derived inundation extent (Green) and major infrastructure around Licuare and Nicodala.

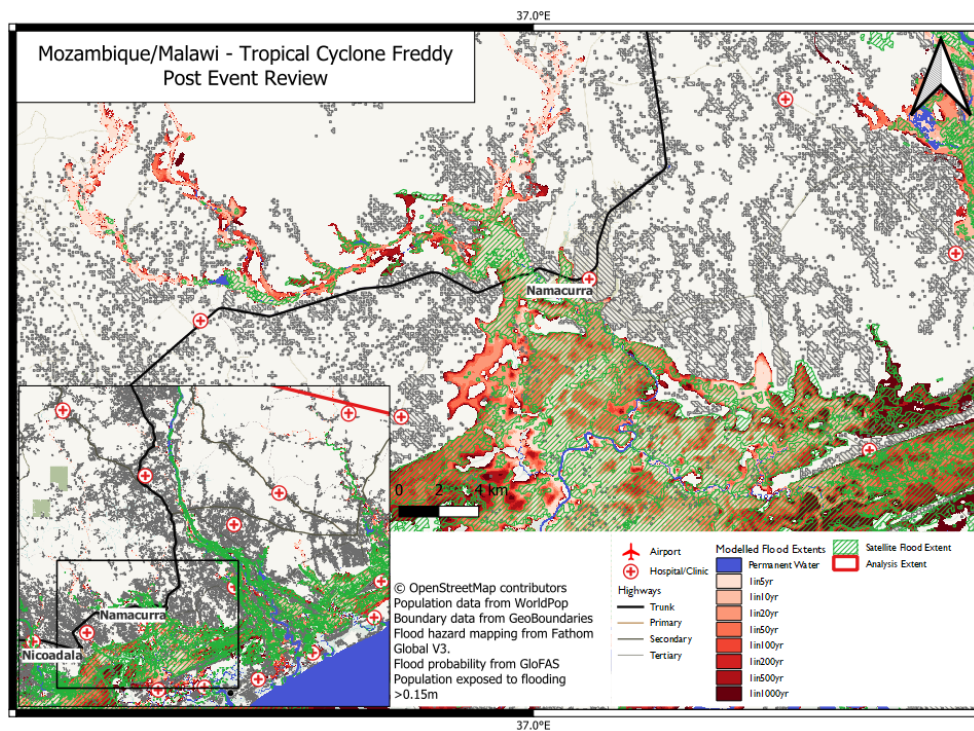

Figure S22: Return period flood extents (red), satellite derived inundation extent (Green) and major infrastructure around Namacurra.



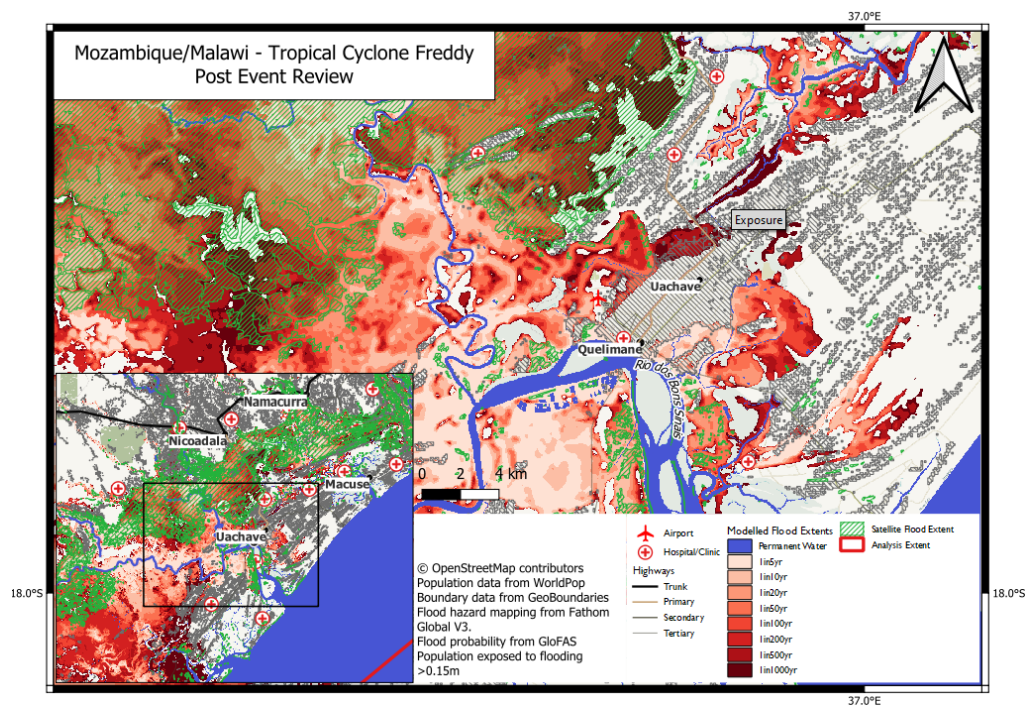

Figure S23: Return period flood extents (red), satellite derived inundation extent (Green) and major infrastructure around Quelimane.

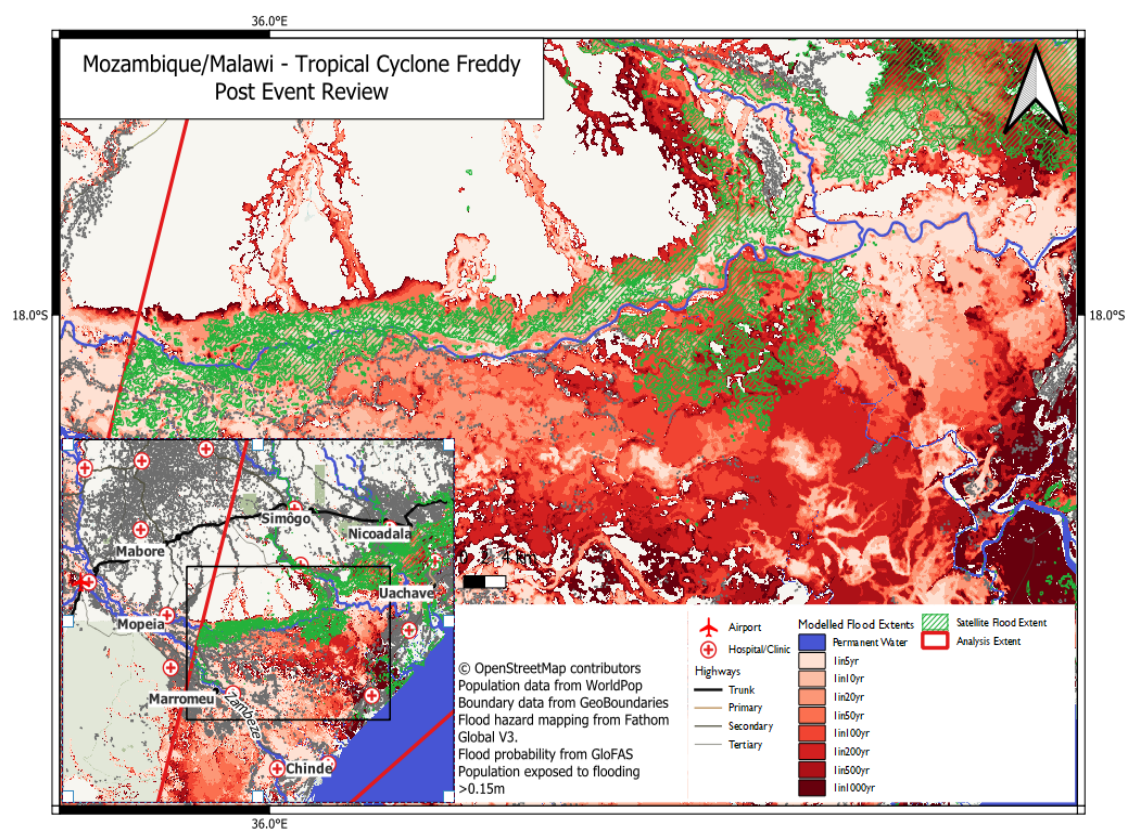

Figure S24: Return period flood extents (red), satellite derived inundation extent (Green) and major infrastructure between Mopeia and Uacheve.

# Copernicus EMSR654 Quelimane Monitoring 1. Situation at 17/03/2023 at 14:53 UTC

Release Date: 2023-03-18 01:32

Post-event image: COSMO-SkyMed© ASI (2023), distributed by e-GEOS S.p.A. (acquired on 17/03/2023 at 14:53 UTC, GSD100.0m), provided under COPERNICUS by the European Union and ESA, all rights reserved.

Scope: Quelimane area - Region between the Zambezi River Mouth and Pebane Town

**Table S8: Exposure by district for Mozambique as observed on 17/03/2023 by COSMO-SkyMed. From left to right columns indicate: administrative district; country; total population of district; the best estimate (BE) of return period in the district given the median return period forecast by GloFAS rounded to the nearest available fathom flood map return period; the reasonable worst case (RWC) given the highest return period forecast (capped at 1 in 100 year); population exposure to the remotely sensed data; and population exposure to fathom return period, where closest to the remote sensing is highlighted in bold and GloFAS best estimates and reasonable worst cases are highlighted in blue and red, respectively.**

| District                | Country | Overall Population | Final Estimate from GloFAS as of 2023-03-13 |         | Exposure from Satellite Extents | Fathom Global Flood Model Fluvial Exposure Estimates by Return Period |            |             |             |             |              |              |             |
|-------------------------|---------|--------------------|---------------------------------------------|---------|---------------------------------|-----------------------------------------------------------------------|------------|-------------|-------------|-------------|--------------|--------------|-------------|
|                         |         |                    | BE                                          | RWC     |                                 | 5                                                                     | 10         | 20          | 50          | 100         | 200          | 500          | 1000        |
| Nicoadala               | MOZ     | 152158             | 1in500                                      | 1in1000 | 15361                           | 1076                                                                  | 2178       | 3323        | 5109        | 7606        | <b>10961</b> | <b>15391</b> | 18462       |
| Namacurra - Namacurra   | MOZ     | 156062             | 1in500                                      | 1in1000 | 6830                            | 771                                                                   | 1452       | 2033        | 2931        | 3558        | 3899         | 4406         | <b>4947</b> |
| Maganja Da Costa        | MOZ     | 177351             | 1in200                                      | 1in500  | 3190                            | 310                                                                   | 970        | 1789        | <b>3268</b> | <b>4091</b> | 4993         | 6705         | 7765        |
| Inhassunge              | MOZ     | 96032              | 1in500                                      | 1in1000 | 1848                            | 27                                                                    | 103        | 147         | 226         | 458         | 776          | 918          | <b>1816</b> |
| Namacurra - Rio Lucungo | MOZ     | 60300              | 1in200                                      | 1in500  | 1707                            | 431                                                                   | 873        | <b>1393</b> | <b>1866</b> | 2589        | 3375         | 4484         | 5167        |
| Mopeia - Not Zambezi    | MOZ     | 22915              | 1in500                                      | 1in1000 | 920                             | 448                                                                   | <b>710</b> | <b>1082</b> | 1740        | 2693        | 3673         | 4754         | 6564        |
| Mocubela                | MOZ     | 54276              | 1in200                                      | 1in500  | 224                             | 26                                                                    | <b>108</b> | <b>327</b>  | 523         | 805         | 899          | 970          | 1022        |
| Maquival                | MOZ     | 111862             | 1in500                                      | 1in1000 | 121                             | <b>65</b>                                                             | <b>143</b> | 229         | 313         | 381         | 489          | 614          | 770         |
| Mocuba - Rio Licungo    | MOZ     | 4821               | 1in200                                      | 1in500  | 20                              | <b>32</b>                                                             | 40         | 48          | 52          | 54          | 54           | 54           | 55          |
| Chinde                  | MOZ     | 3224               |                                             |         | 0                               | <b>0</b>                                                              | 5          | 14          | 115         | 181         | 412          | 612          | 1698        |
| Cidade De Quelimane     | MOZ     | 267158             | 1in500                                      | 1in1000 | 0                               | <b>9172</b>                                                           | 14544      | 17160       | 19555       | 23255       | 27151        | 33439        | 36871       |



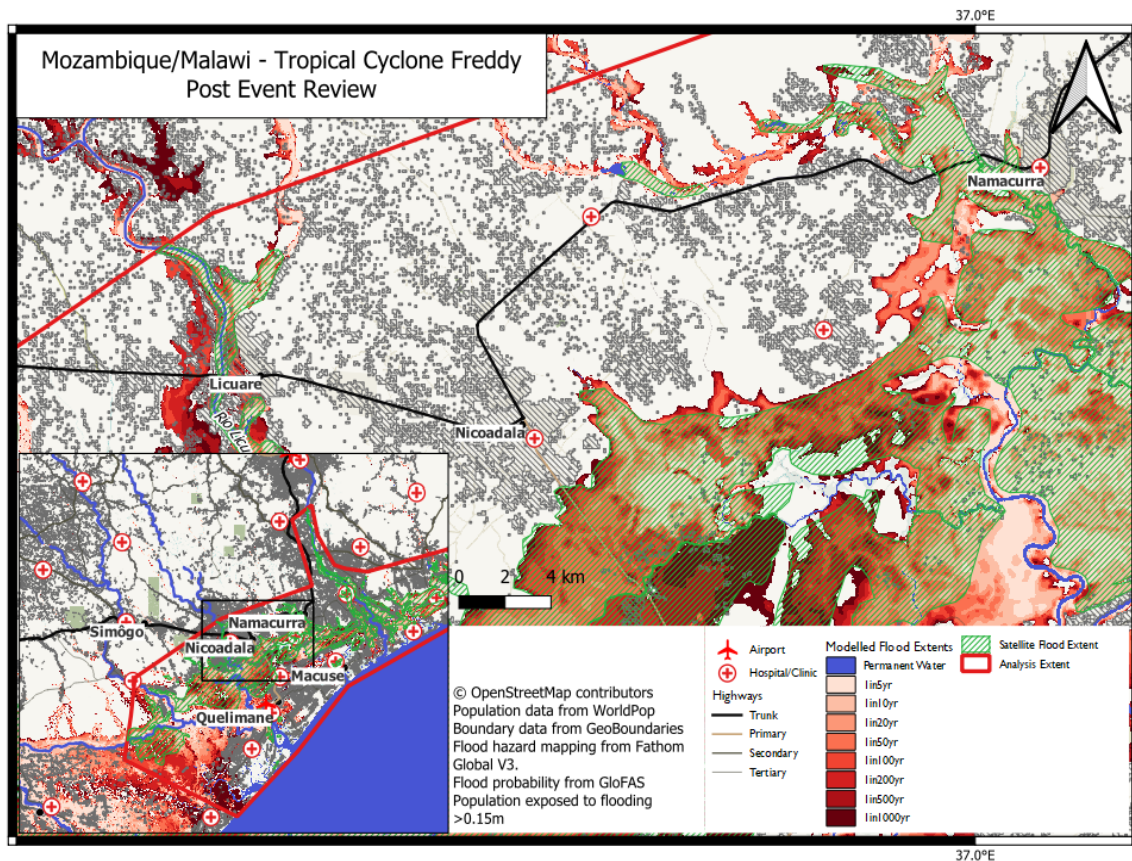

Figure S25: Return period flood extents (red), satellite derived inundation extent (Green) and major infrastructure around Licuare and Nicodala.

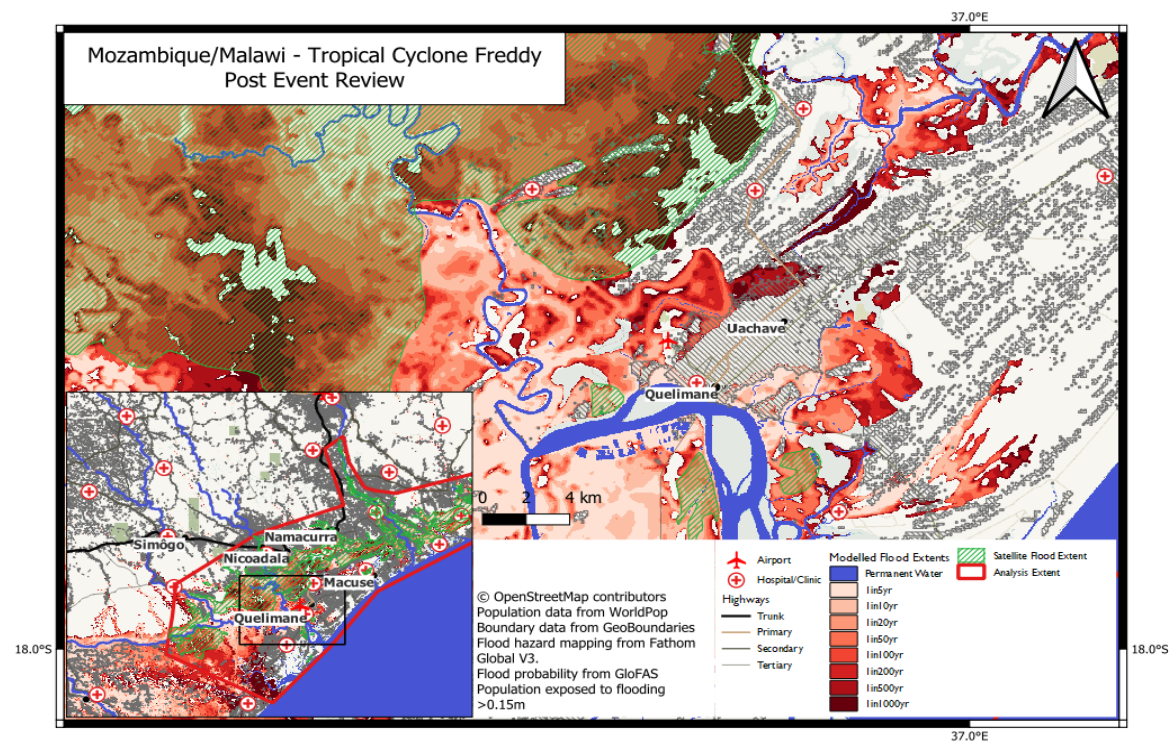

Figure S26: Return period flood extents (red), satellite derived inundation extent (Green) and major infrastructure around Quelimane.

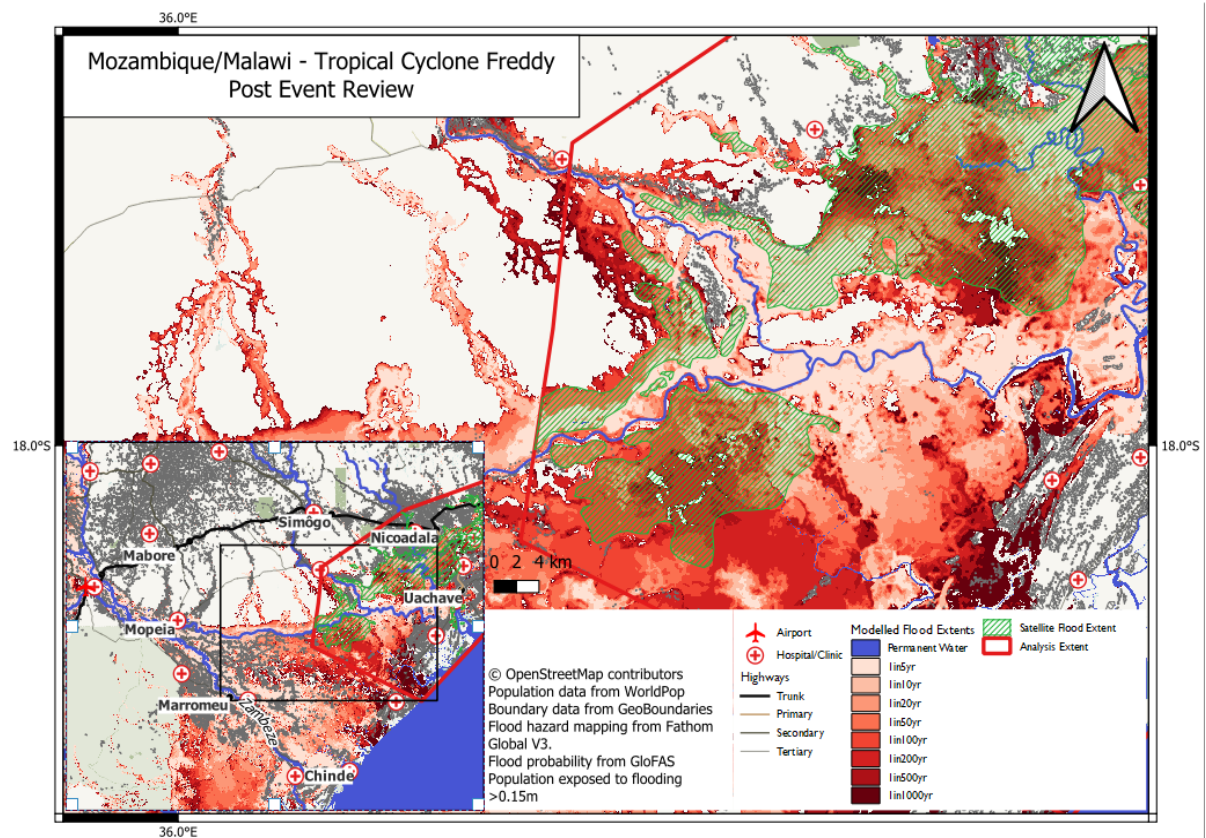

**Figure S27: Return period flood extents (red), satellite derived inundation extent (Green) and major infrastructure east of Mopeia to near Uacheve.**



## Copernicus EMSR654 Mutarara Monitoring 1. Situation at 23/03/2023 at 03:05 UTC

Release Date: 2023-03-23 15:01

Post-event image: RADARSAT 2 Data and products © Mac Donald, Dettwiler and Associates Ltd. (2023). (acquired on 23/03/2023 at 03:05 UTC, GSD50.0m) - RADARSAT is an official mark of the Canadian Space Agency - provided under COPERNICUS by the European Union and ESA, all rights reserved.

Scope: Mopeia Town upstream along the Zambezi and Chire Rivers

**Table S9: Exposure by district for Mozambique as observed on 23/03/2023 by RADARSAT. From left to right columns indicate: administrative district; country; total population of district; the best estimate (BE) of return period in the district given the median return period forecast by GloFAS rounded to the nearest available fathom flood map return period; the reasonable worst case (RWC) given the highest return period forecast (capped at 1 in 100 year); population exposure to the remotely sensed data; and population exposure to fathom return period, where closest to the remote sensing is highlighted in bold and GloFAS best estimates and reasonable worst cases are highlighted in blue and red, respectively.**

| District                  | Country | Population | Final Estimate as of 2023-03-13 |         | Exposure from Satellite Extents | Fathom Global Flood Model Fluvial Exposure Estimates by Return Period |              |              |       |        |        |        |         |
|---------------------------|---------|------------|---------------------------------|---------|---------------------------------|-----------------------------------------------------------------------|--------------|--------------|-------|--------|--------|--------|---------|
|                           |         |            | BE                              | RWC     |                                 | 1in5                                                                  | 1in10        | 1in20        | 1in50 | 1in100 | 1in200 | 1in500 | 1in1000 |
| Mutarara - Not Zambezi    | MOZ     | 95536      | 1in200                          | 1in500  | 19353                           | 6185                                                                  | <b>14262</b> | <b>27209</b> | 41399 | 49416  | 59075  | 67118  | 74088   |
| Morrumbala                | MOZ     | 82355      | 1in200                          | 1in500  | 4943                            | 1983                                                                  | <b>4021</b>  | <b>6716</b>  | 11024 | 13583  | 15801  | 18687  | 21071   |
| Mopeia - Zambezi Region   | MOZ     | 40347      |                                 |         | 883                             | <b>6536</b>                                                           | 11185        | 14514        | 17026 | 18115  | 18928  | 19738  | 20368   |
| Caia - Zambezi Region     | MOZ     | 95644      |                                 |         | 872                             | <b>15130</b>                                                          | 28007        | 36246        | 42268 | 45231  | 47253  | 50366  | 55635   |
| Caia - Not Zambezi        | MOZ     | 31559      | 1in500                          | 1in1000 | 623                             | <b>2031</b>                                                           | 6496         | 10588        | 14637 | 16079  | 17052  | 18125  | 19073   |
| Mopeia - Not Zambezi      | MOZ     | 33646      | 1in500                          | 1in1000 | 498                             | <b>623</b>                                                            | 1605         | 2191         | 2643  | 2917   | 3226   | 3585   | 3857    |
| Mutarara - Zambezi Region | MOZ     | 77743      |                                 |         | 133                             | <b>5285</b>                                                           | 14445        | 24875        | 32669 | 36081  | 38440  | 40914  | 43424   |
| Nsanje                    | MWI     | 679        | 1in200                          | 1in500  | 132                             | <b>59</b>                                                             | <b>178</b>   | 316          | 451   | 526    | 556    | 578    | 594     |
| Doa - Zambezi Region      | MOZ     | 15196      |                                 |         | 70                              | <b>2377</b>                                                           | 2868         | 3501         | 4749  | 5445   | 6046   | 6563   | 7159    |
| Cheringoma - Inland Reg   | MOZ     | 5675       | 1in500                          | 1in1000 | 56                              | <b>136</b>                                                            | 189          | 216          | 265   | 339    | 435    | 620    | 754     |
| Marromeu - Zambezi Region | MOZ     | 50835      |                                 |         | 30                              | <b>538</b>                                                            | 1997         | 6663         | 11350 | 12592  | 13087  | 13558  | 14154   |
| Luabo                     | MOZ     | 4061       |                                 |         | 26                              | <b>647</b>                                                            | 1391         | 2263         | 3073  | 3475   | 3692   | 3883   | 3949    |
| Doa - Not Zambezi         | MOZ     | 20636      | 1in20                           | 1in50   | 10                              | <b>19</b>                                                             | 30           | 55           | 127   | 192    | 320    | 514    | 782     |

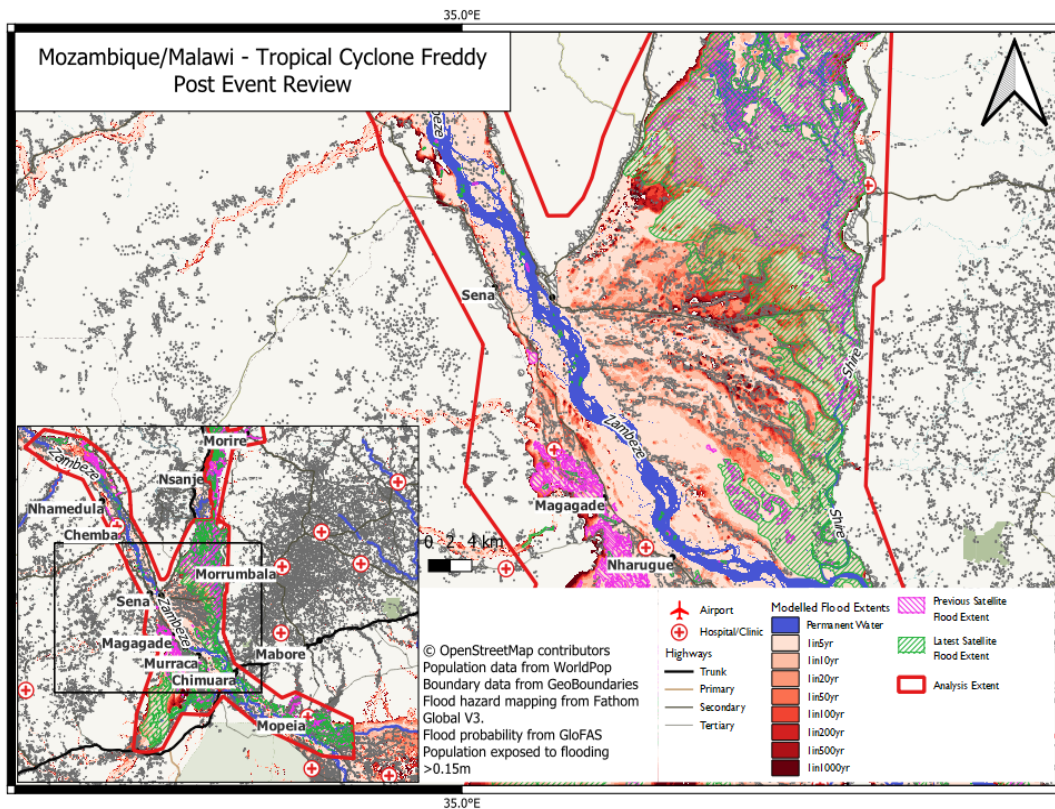

**Figure S28: Return period flood extents (red), satellite derived inundation extent (Green) and major infrastructure at the Shire River and Zambezi River confluence.**
